# Supplementary material
Source: PubMed Central journal article supplement (PMC2988224)
Supplement: mmc1.pdf [file mmc1.pdf]

# THE LANCET

## **Supplementary webappendix**

This webappendix formed part of the original submission and has been peer reviewed. We post it as supplied by the authors.

Supplement to: Cholesterol Treatment Trialists' (CTT) Collaboration. Efficacy and safety of more intensive lowering of LDL cholesterol: a meta-analysis of data from 170 000 participants in 26 randomised trials. *Lancet* 2010; published online November 9, 2010. DOI:10.1016/S0140-6736(10)61350-5.

## **Webappendix for “Efficacy and safety of intensive LDL-cholesterol-lowering therapy: a meta-analysis of data from 170,000 participants in 26 randomised trials”**

### **Tables**

|                                                                                                       |   |
|-------------------------------------------------------------------------------------------------------|---|
| Baseline lipid eligibility criteria and changes in lipid profile in participating trials in mmol/L    | 1 |
| Numbers of first events occurring during the scheduled treatment period for every participating trial | 2 |

### **Figures**

|                                                                                                                                          |       |
|------------------------------------------------------------------------------------------------------------------------------------------|-------|
| Effects on MAJOR VASCULAR EVENTS per mmol/L reduction in LDL cholesterol, by year                                                        | 3     |
| Effects on MAJOR CORONARY EVENTS in each study                                                                                           | 4     |
| Effects on NON FATAL MI in each study                                                                                                    | 5     |
| Effects on CHD DEATH in each study                                                                                                       | 6     |
| Effects on CORONARY REVASCULARISATION in each study                                                                                      | 7     |
| Effects on ANY STROKE in each study                                                                                                      | 8     |
| Effects on ISCHAEMIC STROKE in each study                                                                                                | 9     |
| Effects on HAEMORRHAGIC STROKE in each study                                                                                             | 10    |
| Effects on MAJOR VASCULAR EVENTS per mmol/L reduction in LDL cholesterol, by baseline prognostic factors in 5 more vs. less trials       | 11    |
| Effects on MAJOR VASCULAR EVENTS per mmol/L reduction in LDL cholesterol, by baseline prognostic factors in 21 statin vs. control trials | 12    |
| Effects on CANCER INCIDENCE in each study                                                                                                | 13    |
| <b>References for participating trials</b>                                                                                               | 14-16 |

**Webtable 1: Baseline lipid eligibility criteria and changes in lipid profile in participating trials in mmol/L**

|                               | Entry lipid criteria (mmol/L*)                                                     | Baseline lipid profile (mmol/L) |             |             |             | Mean absolute difference at 1 year (mmol/L) § |              |              |              |
|-------------------------------|------------------------------------------------------------------------------------|---------------------------------|-------------|-------------|-------------|-----------------------------------------------|--------------|--------------|--------------|
|                               |                                                                                    | TC                              | LDL-C       | HDL-C       | TG          | TC                                            | LDL-C        | HDL-C        | TG           |
| <b>More vs. less statin</b>   |                                                                                    |                                 |             |             |             |                                               |              |              |              |
| PROVE-IT †                    | TC ≤6.2 (or ≤5.2 if already on long term lipid lowering)                           | 4.61 †                          | 2.62 †      | 1.03        | 2.00        | -0.80                                         | -0.65        | -0.03        | -0.35        |
| A to Z †                      | TC ≤6.5                                                                            | 4.01 †                          | 2.09 †      | 1.03        | 1.86        | -0.36                                         | -0.30        | -0.004       | -0.11        |
| TNT                           | LDL-C <3.4                                                                         | 4.52                            | 2.52        | 1.22        | 1.70        | -0.74                                         | -0.62        | 0.001        | -0.27        |
| IDEAL †                       | TG ≤6.8                                                                            | 4.56 †                          | 2.64 †      | 1.19        | 1.68        | -0.69                                         | -0.55        | -0.04        | -0.24        |
| SEARCH                        | TC <3.5 for patients on lipid lowering (<4.5 if not)                               | 4.23                            | 2.50        | 1.04        | 1.93        | -0.45                                         | -0.39        | 0.02         | -0.18        |
| <b>Subtotal (5 trials) ¶</b>  |                                                                                    | <b>4.41</b>                     | <b>2.53</b> | <b>1.12</b> | <b>1.81</b> | <b>-0.61</b>                                  | <b>-0.51</b> | <b>-0.01</b> | <b>-0.23</b> |
| <b>Statin vs. control</b>     |                                                                                    |                                 |             |             |             |                                               |              |              |              |
| SSSS                          | TC 5.5-8 , TG ≤2.5                                                                 | 6.74                            | 4.88        | 1.19        | 1.50        | -1.81                                         | -1.77        | 0.08         | -0.27        |
| WOSCOPS                       | LDL-C 4-6                                                                          | 7.03                            | 4.96        | 1.14        | 1.84        | -1.14                                         | -1.07        | 0.05         | -0.17        |
| CARE                          | TC <6.2 , LDL-C 3.0-4.5 , TG <4.0                                                  | 5.39                            | 3.58        | 1.00        | 1.76        | -1.12                                         | -1.03        | 0.04         | -0.24        |
| Post CABG                     | LDL-C 3.4-4.5 , TG <3.4                                                            | 5.86                            | 4.02        | 1.02        | 1.81        | -1.17                                         | -1.07        | 0.02         | -0.30        |
| AFCAPS/TexCaps                | TC 4.7-6.8 , LDL-C 3.4-4.9 , HDL ≥1.2 , TG ≤4.5 (LDL-C 3.2-3.3 if TC/HDL ratio >6) | 5.71                            | 3.89        | 0.96        | 1.90        | -1.02                                         | -0.94        | 0.04         | -0.23        |
| LIPID                         | TC 4-7 , TG <5.0                                                                   | 5.66                            | 3.88        | 0.96        | 1.81        | -1.09                                         | -1.03        | 0.05         | -0.16        |
| GISSI-P                       | TC 5.2-6.5                                                                         | 5.93                            | 3.92        | 1.18        | 1.88        | -0.36                                         | -0.35        | 0.01         | -0.01        |
| LIPS                          | TC 3.5-7.0 , TG <4.5                                                               | 5.17                            | 3.42        | 0.97        | 1.74        | -0.96                                         | -0.92        | 0.03         | -0.14        |
| HPS                           | TC ≥ 3.5                                                                           | 5.85                            | 3.38        | 1.06        | 2.09        | -1.68                                         | -1.29        | 0.02         | -0.42        |
| PROSPER                       | TC 4.0-9.0 , TG <6.0                                                               | 5.68                            | 3.79        | 1.28        | 1.54        | -1.07                                         | -1.04        | 0.07         | -0.16        |
| ALLHAT-LLT                    | LDL-C 3.1-4.9(or 2.6-3.3 if known CHD) , TG<3.9                                    | 5.79                            | 3.76        | 1.23        | 1.75        | -0.64                                         | -0.54        | 0.03         | -0.17        |
| ASCOT-LLA                     | TC ≤ 6.5                                                                           | 5.48                            | 3.44        | 1.31        | 1.65        | -1.18                                         | -1.07        | 0.02         | -0.25        |
| ALERT                         | TC 4.0-9.0(or 4.0-7.0 if patient had MI >6months before randomisation)             | 6.45                            | 4.14        | 1.34        | 2.21        | -0.86                                         | -0.84        | 0.02         | -0.13        |
| CARDS                         | LDL-C ≤ 4.1 , TG ≤6.8                                                              | 5.35                            | 3.03        | 1.40        | 1.94        | -1.35                                         | -1.14        | -0.01        | -0.36        |
| ALLIANCE <sup>a</sup>         | LDL-C 2.8-5.2 for patients on lipid lowering (3.4-6.5 if not)                      | 5.86                            | 3.80        | 1.05        | 2.24        | -1.34                                         | -1.16        | -0.04        | -0.30        |
| 4D <sup>a</sup>               | LDL-C 2.1-4.9 , TG ≤11.3                                                           | 5.67                            | 3.25        | 0.94        | 2.98        | -1.12                                         | -0.89        | 0.05         | -0.45        |
| ASPEN <sup>a</sup>            | LDL-C ≤ 3.6 if patients had MI or intervention procedure ( ≤ 4.1 if not) , TG ≤6.8 | 5.01                            | 2.93        | 1.21        | 1.92        | -1.14                                         | -0.99        | 0.04         | -0.39        |
| MEGA <sup>a</sup>             | TC 5.7-7.0                                                                         | 6.27                            | 4.05        | 1.48        | 1.68        | -0.67                                         | -0.67        | 0.05         | -0.11        |
| JUPITER <sup>a</sup>          | LDL-C ≤3.4                                                                         | 4.74                            | 2.70        | 1.33        | 1.56        | -1.14                                         | -1.09        | 0.05         | -0.23        |
| GISSI-HF <sup>a</sup>         | No qualifying lipid criteria                                                       | 5.00                            | 3.06        | 1.23        | 1.62        | -1.03                                         | -0.92        | 0.007        | -0.18        |
| AURORA <sup>a</sup>           | No qualifying lipid criteria                                                       | 4.53                            | 2.58        | 1.16        | 1.76        | -1.06                                         | -0.99        | 0.04         | -0.23        |
| <b>Subtotal (21 trials) ¶</b> |                                                                                    | <b>5.76</b>                     | <b>3.70</b> | <b>1.12</b> | <b>1.85</b> | <b>-1.22</b>                                  | <b>-1.07</b> | <b>0.04</b>  | <b>-0.25</b> |

Trial abbreviations as in Table 1; TC=Total Cholesterol; LDL-C=Low density lipoprotein cholesterol; HDL-C=High density lipoprotein cholesterol; TG=Triglycerides.

\* To convert values from mmol/L to mg/dL, divide TG by 0.01129 and other lipids by 0.02586.

§ In trials where the LDL-C at 1 year was missing (or >10mmol/L) the baseline value was assigned. In some studies, only a sub-sample of participants were selected for 1 year blood samples: HPS (~4% of trial participants); SEARCH (~3% of participants). In other studies, no samples at 1 year were taken and so other blood samples were used: In A to Z and PROVE-IT, blood samples taken at 8 months were used. In ALLHAT samples taken at 2 years (from a random sample of 10% of participants randomised to pravastatin and 5% of participants randomised to usual care) were used. In ALLIANCE, lipid differences at 1 year in the usual care group were interpolated from those at baseline and final follow-up because the 1 year bloods were assayed in different laboratories depending on treatment allocation.

¶ Average values weighted by the trial-specific variances of the 'logrank' O minus E statistics for major vascular events are shown.

† These three trials did not have active run-in periods; the values shown are the estimated average on-treatment total and LDL-C levels in the standard statin group; <sup>a</sup> Additional statin vs. control trials included in this second cycle of analyses.

**Webtable 2: Numbers of first events occurring during scheduled treatment period for every participating trial**

|                             | Number of patients | Major coronary events* | Haemo-rrhagic | Definite ischaemic | Unknown     | Any†        | CRV          | Major vascular events* | Any cancer ‡ | Vascular mortality |               |                      |                         | Non-vascular mortality |             |             |            |                    |             |              |
|-----------------------------|--------------------|------------------------|---------------|--------------------|-------------|-------------|--------------|------------------------|--------------|--------------------|---------------|----------------------|-------------------------|------------------------|-------------|-------------|------------|--------------------|-------------|--------------|
|                             |                    |                        |               |                    |             |             |              |                        |              | CHD                | Other Cardiac | Haemo-rrhagic stroke | Non haemorrhagic stroke | Other vascular         | Cancer      | Respiratory | Trauma     | Other non vascular | Unknown     | Any          |
| <b>More vs. less statin</b> |                    |                        |               |                    |             |             |              |                        |              |                    |               |                      |                         |                        |             |             |            |                    |             |              |
| PROVE-IT                    | 4162               | 319                    | 5             | 22                 | 13          | 40          | 675          | 864                    | 134          | 53                 | 0             | 0                    | 2                       | 8                      | 25          | 5           | 5          | 9                  | 12          | 119          |
| A to Z                      | 4497               | 346                    | 6             | 53                 | 5           | 64          | 243          | 539                    | 70           | 71                 | 104           | 4                    | 3                       | 2                      | 23          | 0           | 0          | 0                  | 27          | 234          |
| TNT                         | 10001              | 621                    | 33            | 226                | 13          | 272         | 1571         | 2053                   | 684          | 99                 | 129           | 5                    | 25                      | 23                     | 160         | 0           | 24         | 101                | 0           | 566          |
| IDEAL                       | 8888               | 863                    | 35            | 287                | 3           | 325         | 1322         | 2044                   | 748          | 353                | 19            | 3                    | 36                      | 30                     | 211         | 0           | 14         | 0                  | 74          | 740          |
| SEARCH                      | 12064              | 1549                   | 47            | 378                | 109         | 534         | 1180         | 2753                   | 1302         | 763                | 142           | 30                   | 94                      | 108                    | 512         | 133         | 26         | 120                | 6           | 1934         |
| <b>Subtotal (5 trials)</b>  | <b>39612</b>       | <b>3698</b>            | <b>126</b>    | <b>966</b>         | <b>143</b>  | <b>1235</b> | <b>4991</b>  | <b>8253</b>            | <b>2938</b>  | <b>1339</b>        | <b>394</b>    | <b>42</b>            | <b>160</b>              | <b>171</b>             | <b>931</b>  | <b>138</b>  | <b>69</b>  | <b>230</b>         | <b>119</b>  | <b>3593</b>  |
| <b>Statin vs. control</b>   |                    |                        |               |                    |             |             |              |                        |              |                    |               |                      |                         |                        |             |             |            |                    |             |              |
| SSSS                        | 4444               | 931                    | 11            | 85                 | 36          | 132         | 635          | 1351                   | 183          | 300                | 1             | 7                    | 19                      | 16                     | 68          | 0           | 13         | 14                 | 0           | 438          |
| WOSCOPS                     | 6595               | 395                    | ..            | ..                 | 97          | 97          | 130          | 550                    | 208          | 53                 | 52            | 0                    | 10                      | 8                      | 93          | 0           | 11         | 0                  | 14          | 241          |
| CARE                        | 4159               | 394                    | 8             | 112                | 8           | 128         | 685          | 986                    | 307          | 96                 | 119           | 2                    | 12                      | 13                     | 94          | 0           | 12         | 0                  | 28          | 376          |
| Post CABG                   | 1351               | 75                     | ..            | ..                 | 34          | 34          | 117          | 179                    | 44           | 10                 | 0             | 0                    | 0                       | 0                      | 0           | 0           | 0          | 0                  | 57          | 67           |
| AFCAPS/TexCaps              | 6605               | 170                    | 1             | 2                  | 28          | 31          | 263          | 344                    | 481          | 26                 | 7             | 1                    | 9                       | 3                      | 83          | 10          | 5          | 13                 | 0           | 157          |
| LIPID                       | 9014               | 864                    | 26            | 277                | 70          | 373         | 1290         | 2089                   | 793          | 185                | 475           | 7                    | 42                      | 55                     | 269         | 0           | 17         | 0                  | 81          | 1131         |
| GISSI-P                     | 4271               | 100                    | 1             | 28                 | 10          | 39          | 329          | 439                    | 36           | 26                 | 70            | 0                    | 8                       | 4                      | 19          | 0           | 0          | 8                  | 24          | 159          |
| LIPS                        | 1677               | 74                     | ..            | ..                 | ..          | \$          | 331          | 359                    | 73           | 4                  | 29            | 0                    | 3                       | 1                      | 30          | 4           | 2          | 5                  | 7           | 85           |
| HPS                         | 20536              | 1722                   | 108           | 682                | 253         | 1043        | 1238         | 3554                   | 1566         | 850                | 491           | 47                   | 168                     | 181                    | 702         | 204         | 34         | 144                | 14          | 2835         |
| PROSPER                     | 5804               | 648                    | 18            | 179                | 69          | 266         | 87           | 926                    | 439          | 216                | 0             | 1                    | 35                      | 40                     | 206         | 0           | 0          | 0                  | 106         | 604          |
| ALLHAT-LLT                  | 10355              | 801                    | 22            | 154                | 264         | 440         | 647          | 1570                   | 747          | 322                | 66            | 11                   | 98                      | 98                     | 311         | 0           | 33         | 260                | 73          | 1272         |
| ASCOT-LLA                   | 10305              | 254                    | 31            | 169                | 10          | 210         | 132          | 524                    | 462          | 87                 | 0             | 13                   | 24                      | 32                     | 168         | 4           | 0          | 37                 | 32          | 397          |
| ALERT                       | 2102               | 137                    | ..            | ..                 | 104         | 104         | 112          | 275                    | 156          | 18                 | 72            | 0                    | 31                      | 18                     | 70          | 0           | 8          | 51                 | 13          | 281          |
| CARDS                       | 2838               | 118                    | 0             | 33                 | 27          | 60          | 58           | 204                    | 119          | 47                 | 3             | 0                    | 8                       | 4                      | 50          | 0           | 7          | 3                  | 21          | 143          |
| ALLIANCE <sup>a</sup>       | 2442               | 161                    | ..            | ..                 | 77          | 77          | 422          | 547                    | 149          | 18                 | 86            | 0                    | 11                      | 4                      | 44          | 20          | 7          | 17                 | 41          | 248          |
| 4D <sup>a</sup>             | 1255               | 130                    | 12            | 79                 | 12          | 103         | 127          | 306                    | 94           | 69                 | 201           | 8                    | 32                      | 8                      | 39          | 0           | 0          | 210                | 50          | 617          |
| ASPEN <sup>a</sup>          | 2410               | 117                    | 6             | 29                 | 37          | 72          | 98           | 250                    | 127          | 21                 | 43            | 2                    | 8                       | 3                      | 38          | 5           | 4          | 14                 | 0           | 138          |
| MEGA <sup>a</sup>           | 8214               | 53                     | 35            | 90                 | 2           | 127         | 108          | 242                    | 260          | 5                  | 19            | 2                    | 4                       | 2                      | 63          | 9           | 15         | 9                  | 17          | 145          |
| JUPITER <sup>a</sup>        | 17802              | 111                    | 15            | 70                 | 14          | 99          | 151          | 299                    | 527          | 28                 | 41            | 6                    | 10                      | 9                      | 93          | 46          | 8          | 64                 | 140         | 445          |
| GISSI-HF <sup>a</sup>       | 4574               | 140                    | 14            | 116                | 18          | 148         | 84           | 346                    | 245          | 35                 | 814           | 10                   | 57                      | 50                     | 156         | 21          | 9          | 100                | 49          | 1301         |
| AURORA <sup>a</sup>         | 2773               | 524                    | 43            | 107                | 14          | 164         | 125          | 730                    | 170          | 413                | 66            | 32                   | 44                      | 93                     | 52          | 0           | 0          | 464                | 132         | 1296         |
| <b>Subtotal (21 trials)</b> | <b>129526</b>      | <b>7919</b>            | <b>351</b>    | <b>2212</b>        | <b>1184</b> | <b>3747</b> | <b>7169</b>  | <b>16070</b>           | <b>7186</b>  | <b>2829</b>        | <b>2655</b>   | <b>149</b>           | <b>633</b>              | <b>642</b>             | <b>2648</b> | <b>323</b>  | <b>185</b> | <b>1413</b>        | <b>899</b>  | <b>12376</b> |
| <b>Total (26 trials)</b>    | <b>169138</b>      | <b>11617</b>           | <b>477</b>    | <b>3178</b>        | <b>1327</b> | <b>4982</b> | <b>12160</b> | <b>24323</b>           | <b>10124</b> | <b>4168</b>        | <b>3049</b>   | <b>191</b>           | <b>793</b>              | <b>813</b>             | <b>3579</b> | <b>461</b>  | <b>254</b> | <b>1643</b>        | <b>1018</b> | <b>15969</b> |

Trial abbreviations as in Table 1.

\* In the current analysis cycle, sudden death and deaths due to arrhythmia, heart failure, or unspecified cardiac causes have been recoded as 'other cardiac'; the numbers of major coronary events and major vascular events in some of the trials therefore differ slightly from those previously reported in the first CTT cycle (reference 1 of the manuscript); † Stroke subtype data available for 4670 strokes recorded in 21 trials.

‡ Excludes ICD9 codes 173 and 210-239 (unless this code given as cause of death in which case it is coded as unknown cancer death); \$ LIPS only provided information on stroke death. <sup>a</sup> Additional statin vs. control trials included in this second cycle of analyses.

**Webfigure 1: Effects on MAJOR VASCULAR EVENTS per mmol/L reduction in LDL cholesterol, by year**

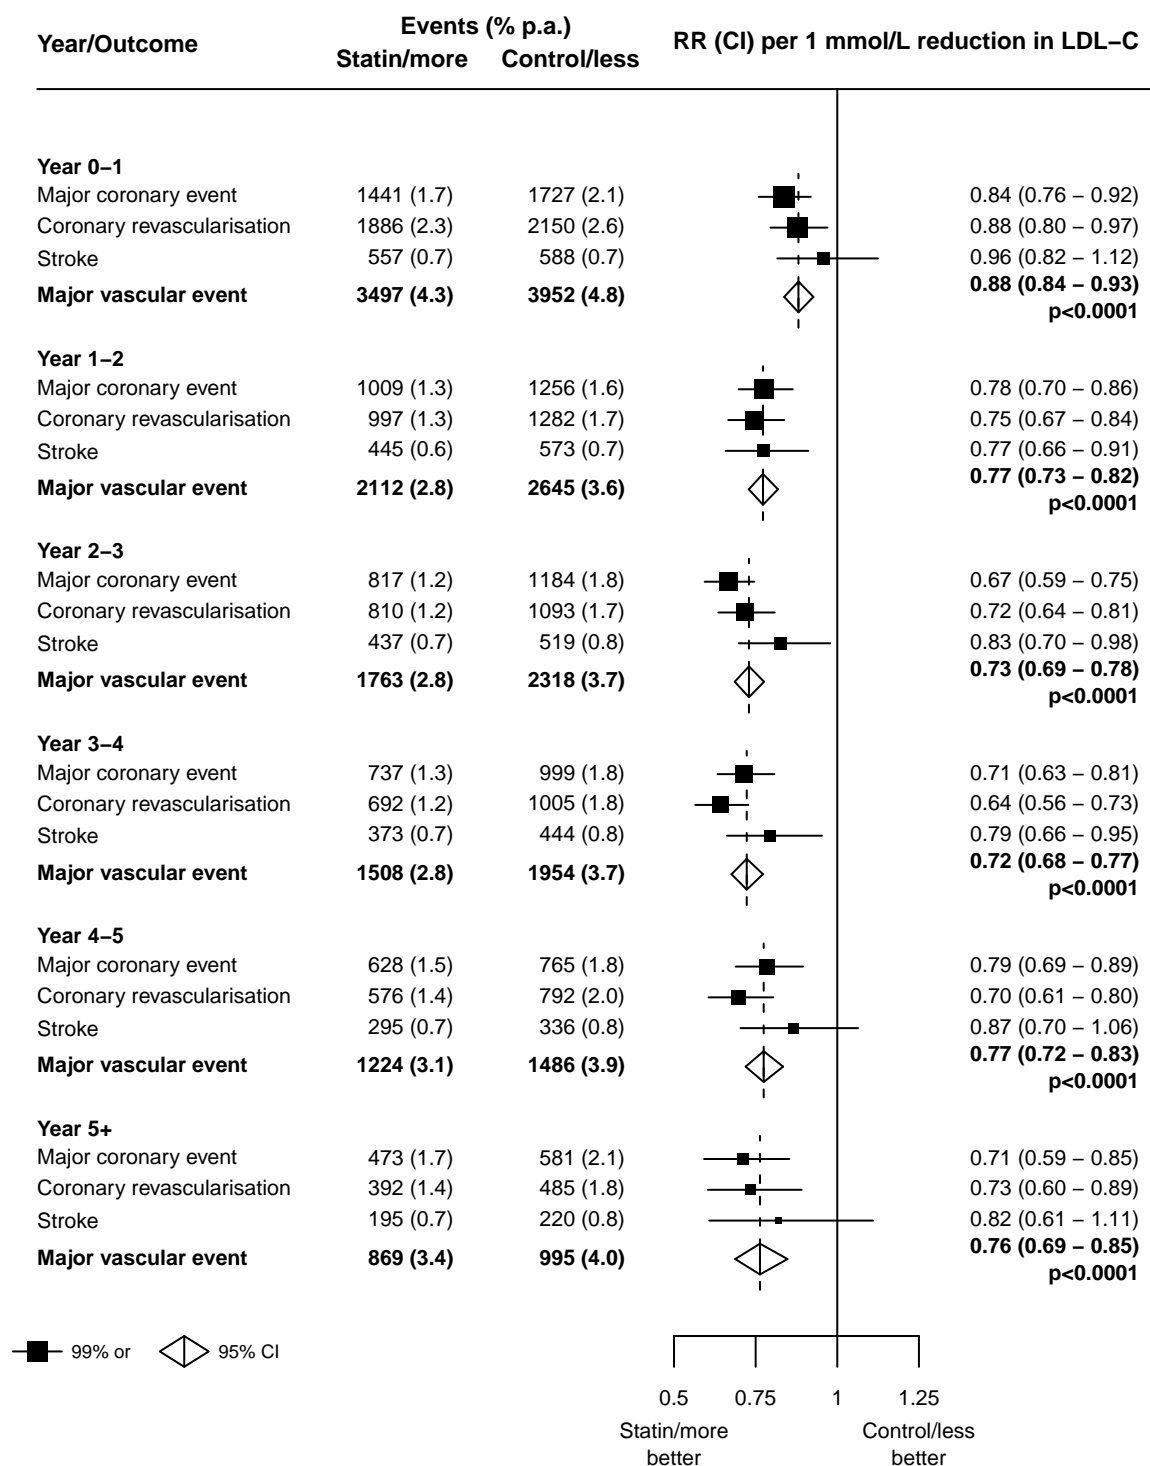

**Webfigure 2: Effects on MAJOR CORONARY EVENTS in each study**

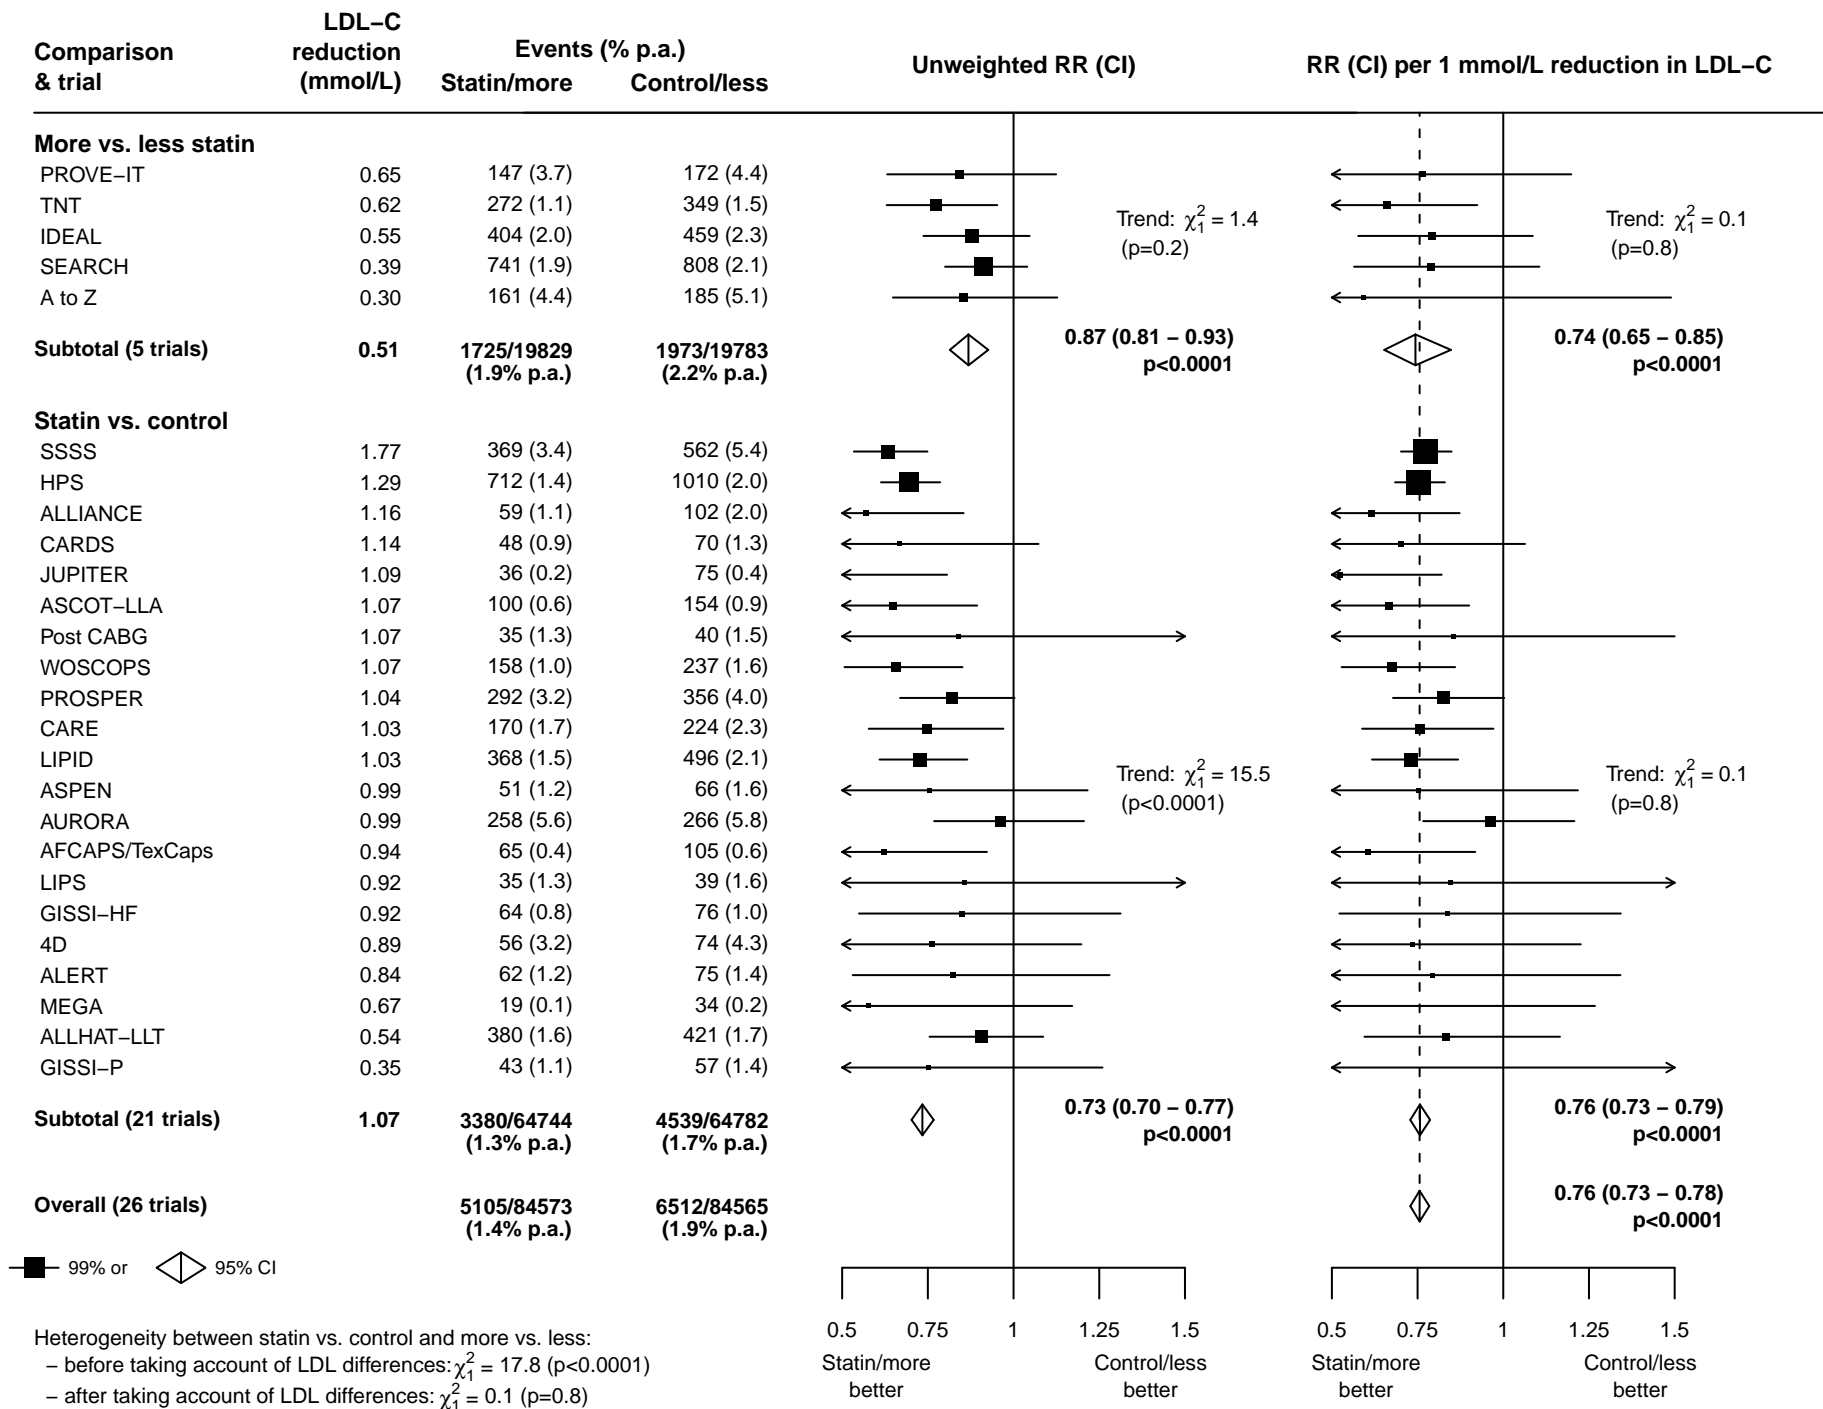

**Webfigure 3: Effects on NONFATAL MI in each study**

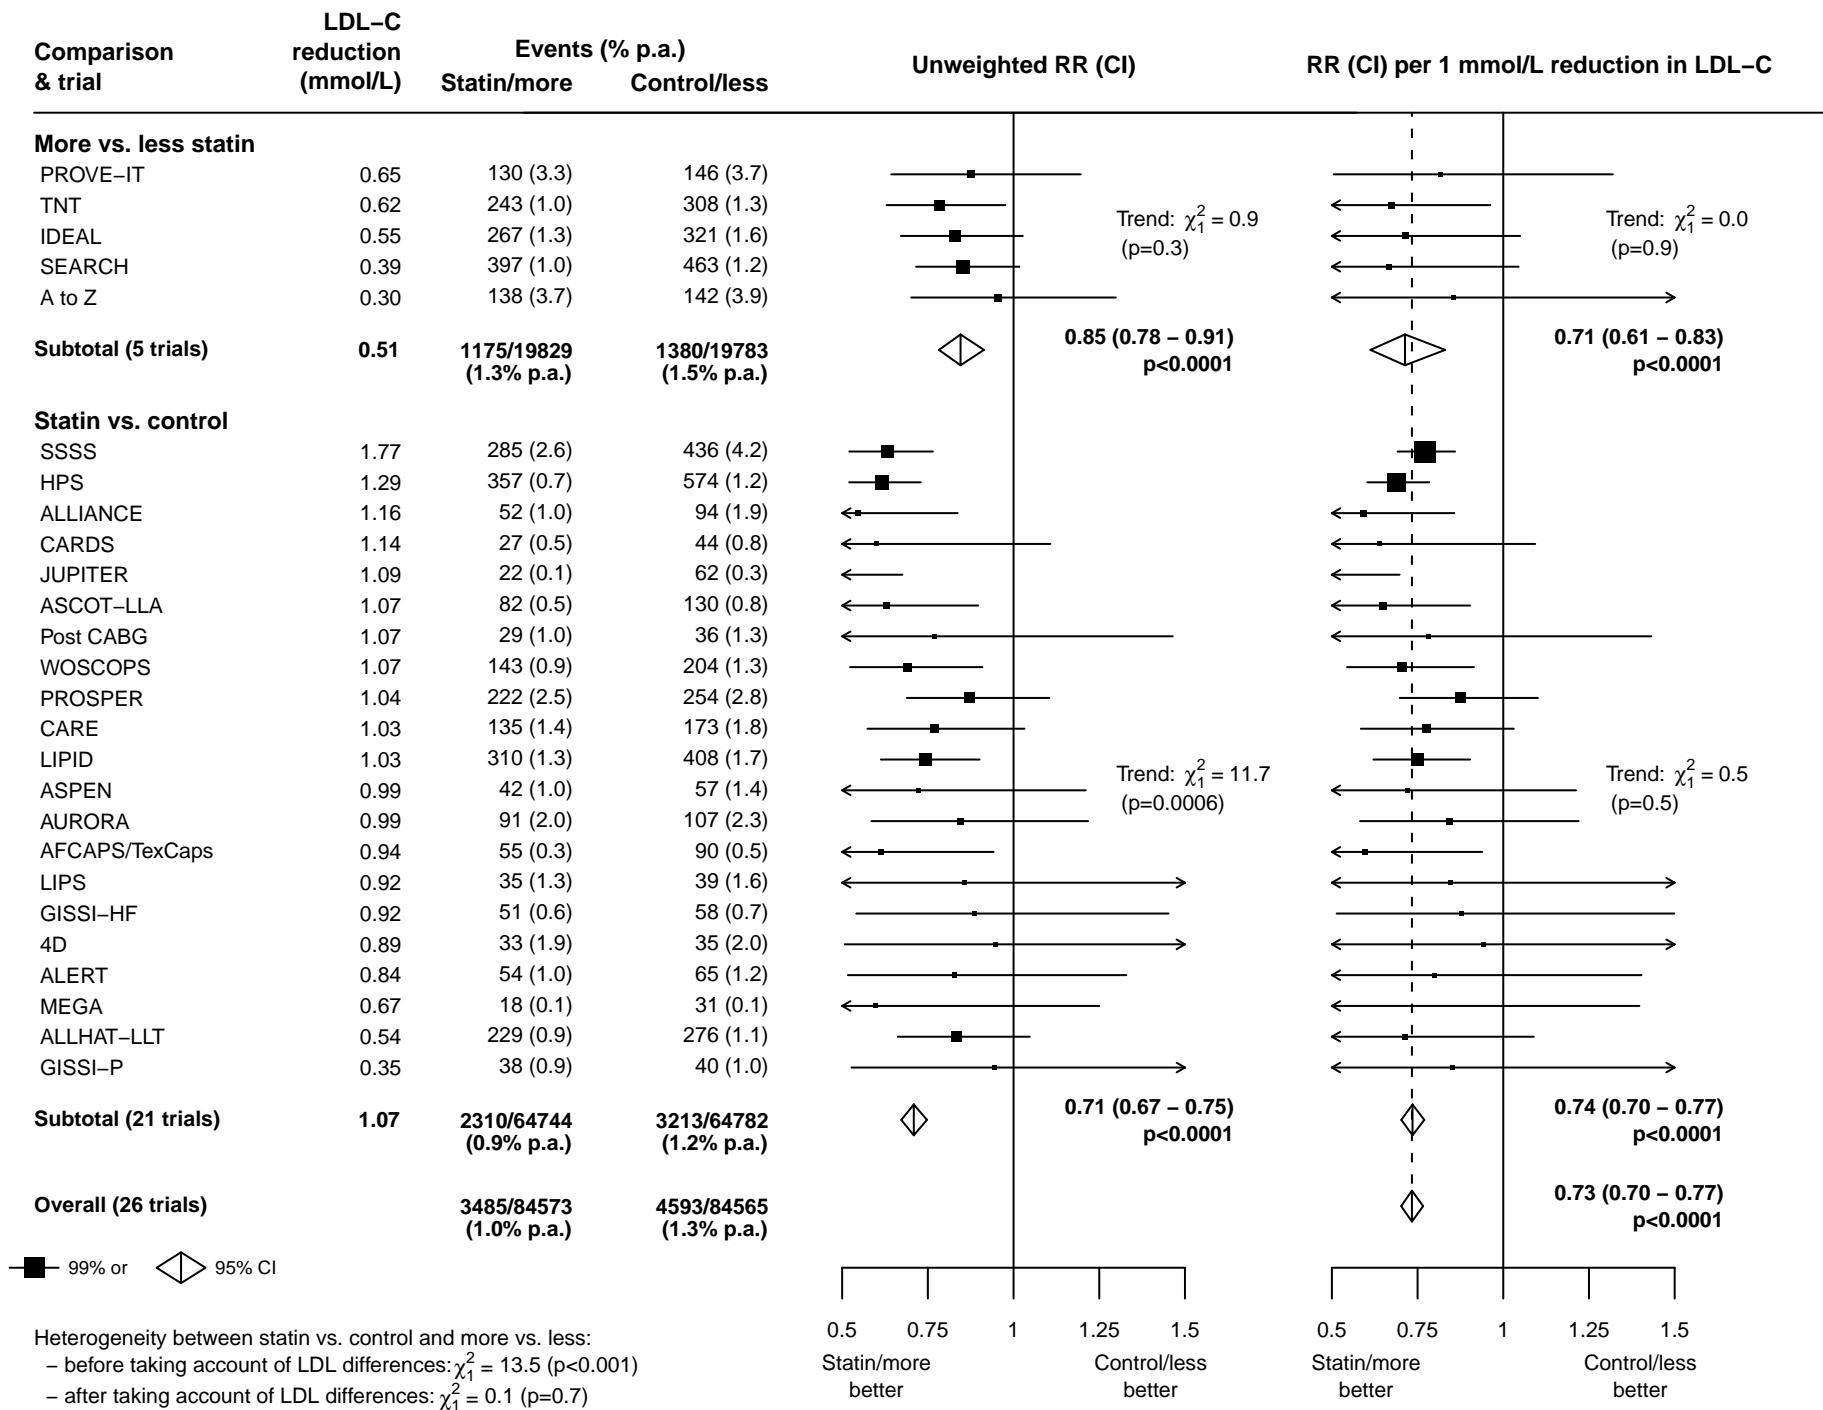

**Webfigure 4: Effects on CHD DEATH in each study**

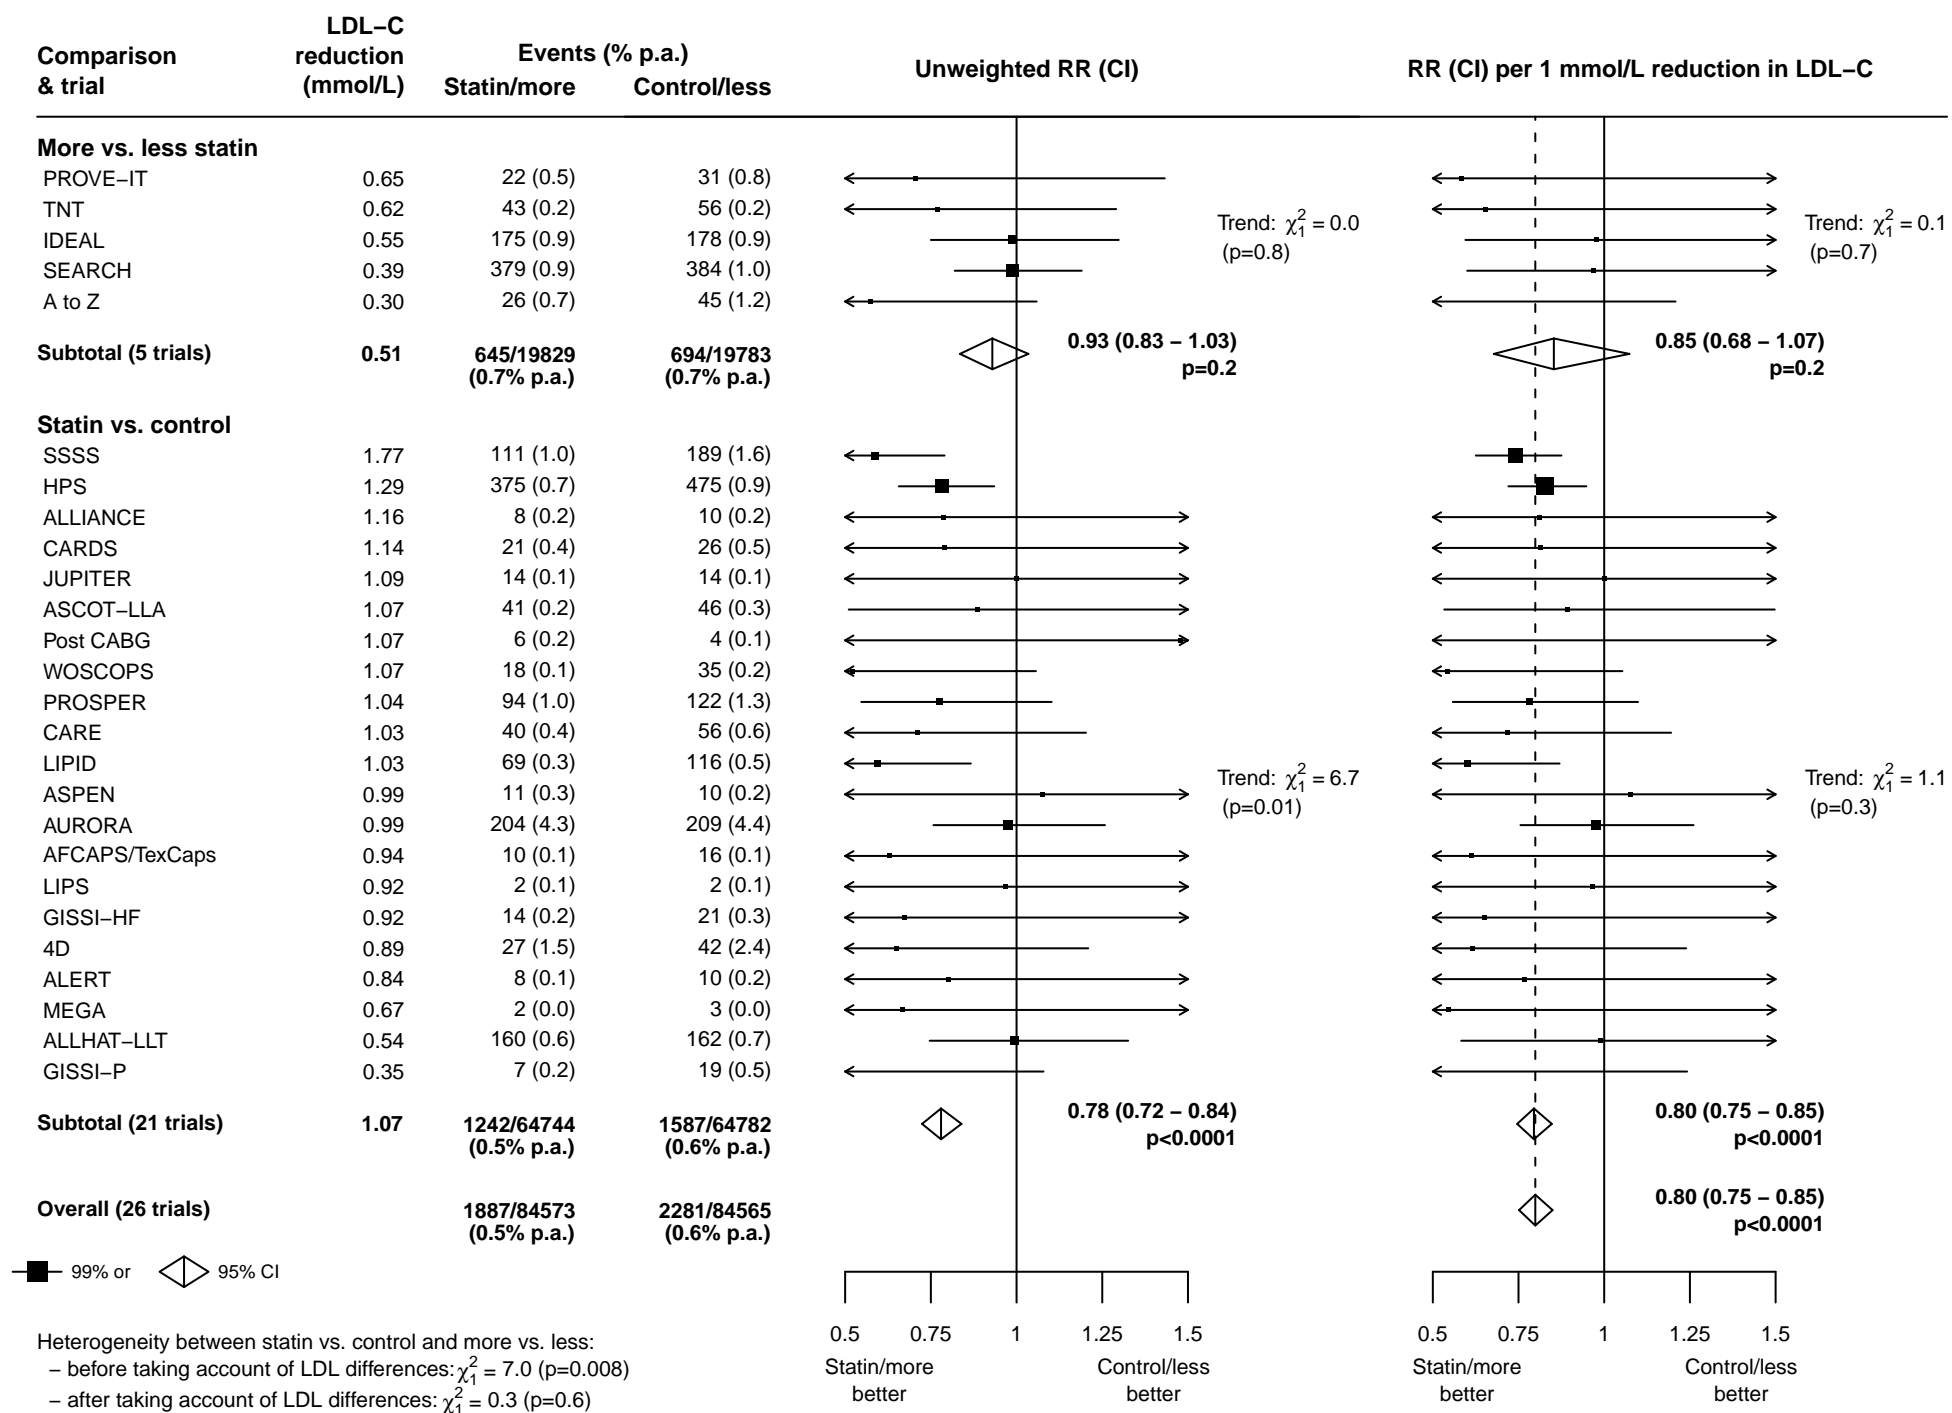



**Webfigure 5: Effects on CORONARY REVASCULARISATION in each study**

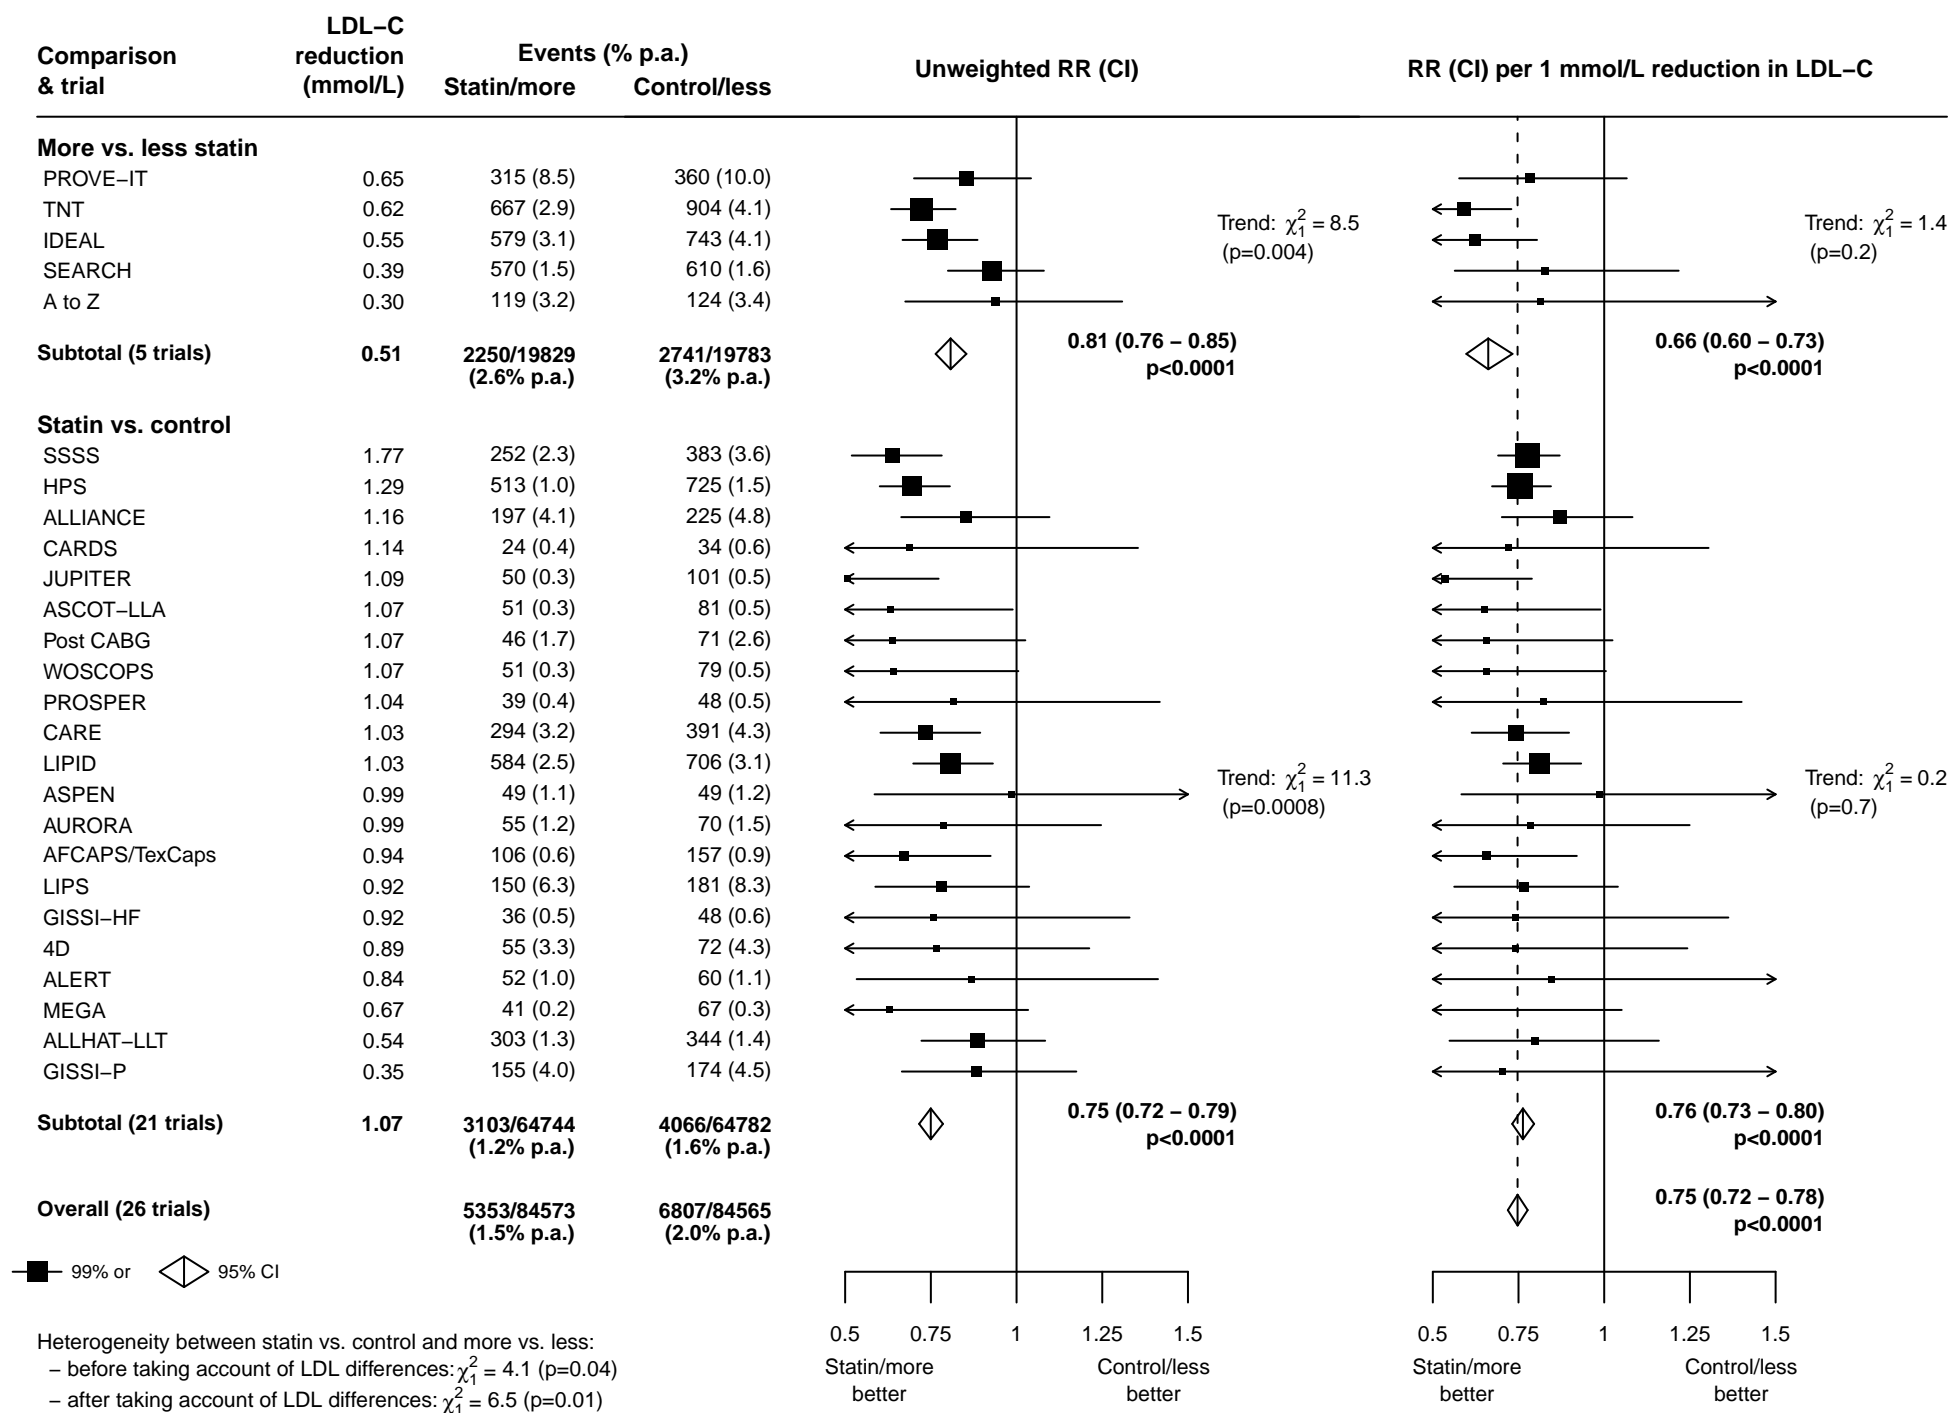

**Webfigure 6: Effects on ANY STROKE in each study**

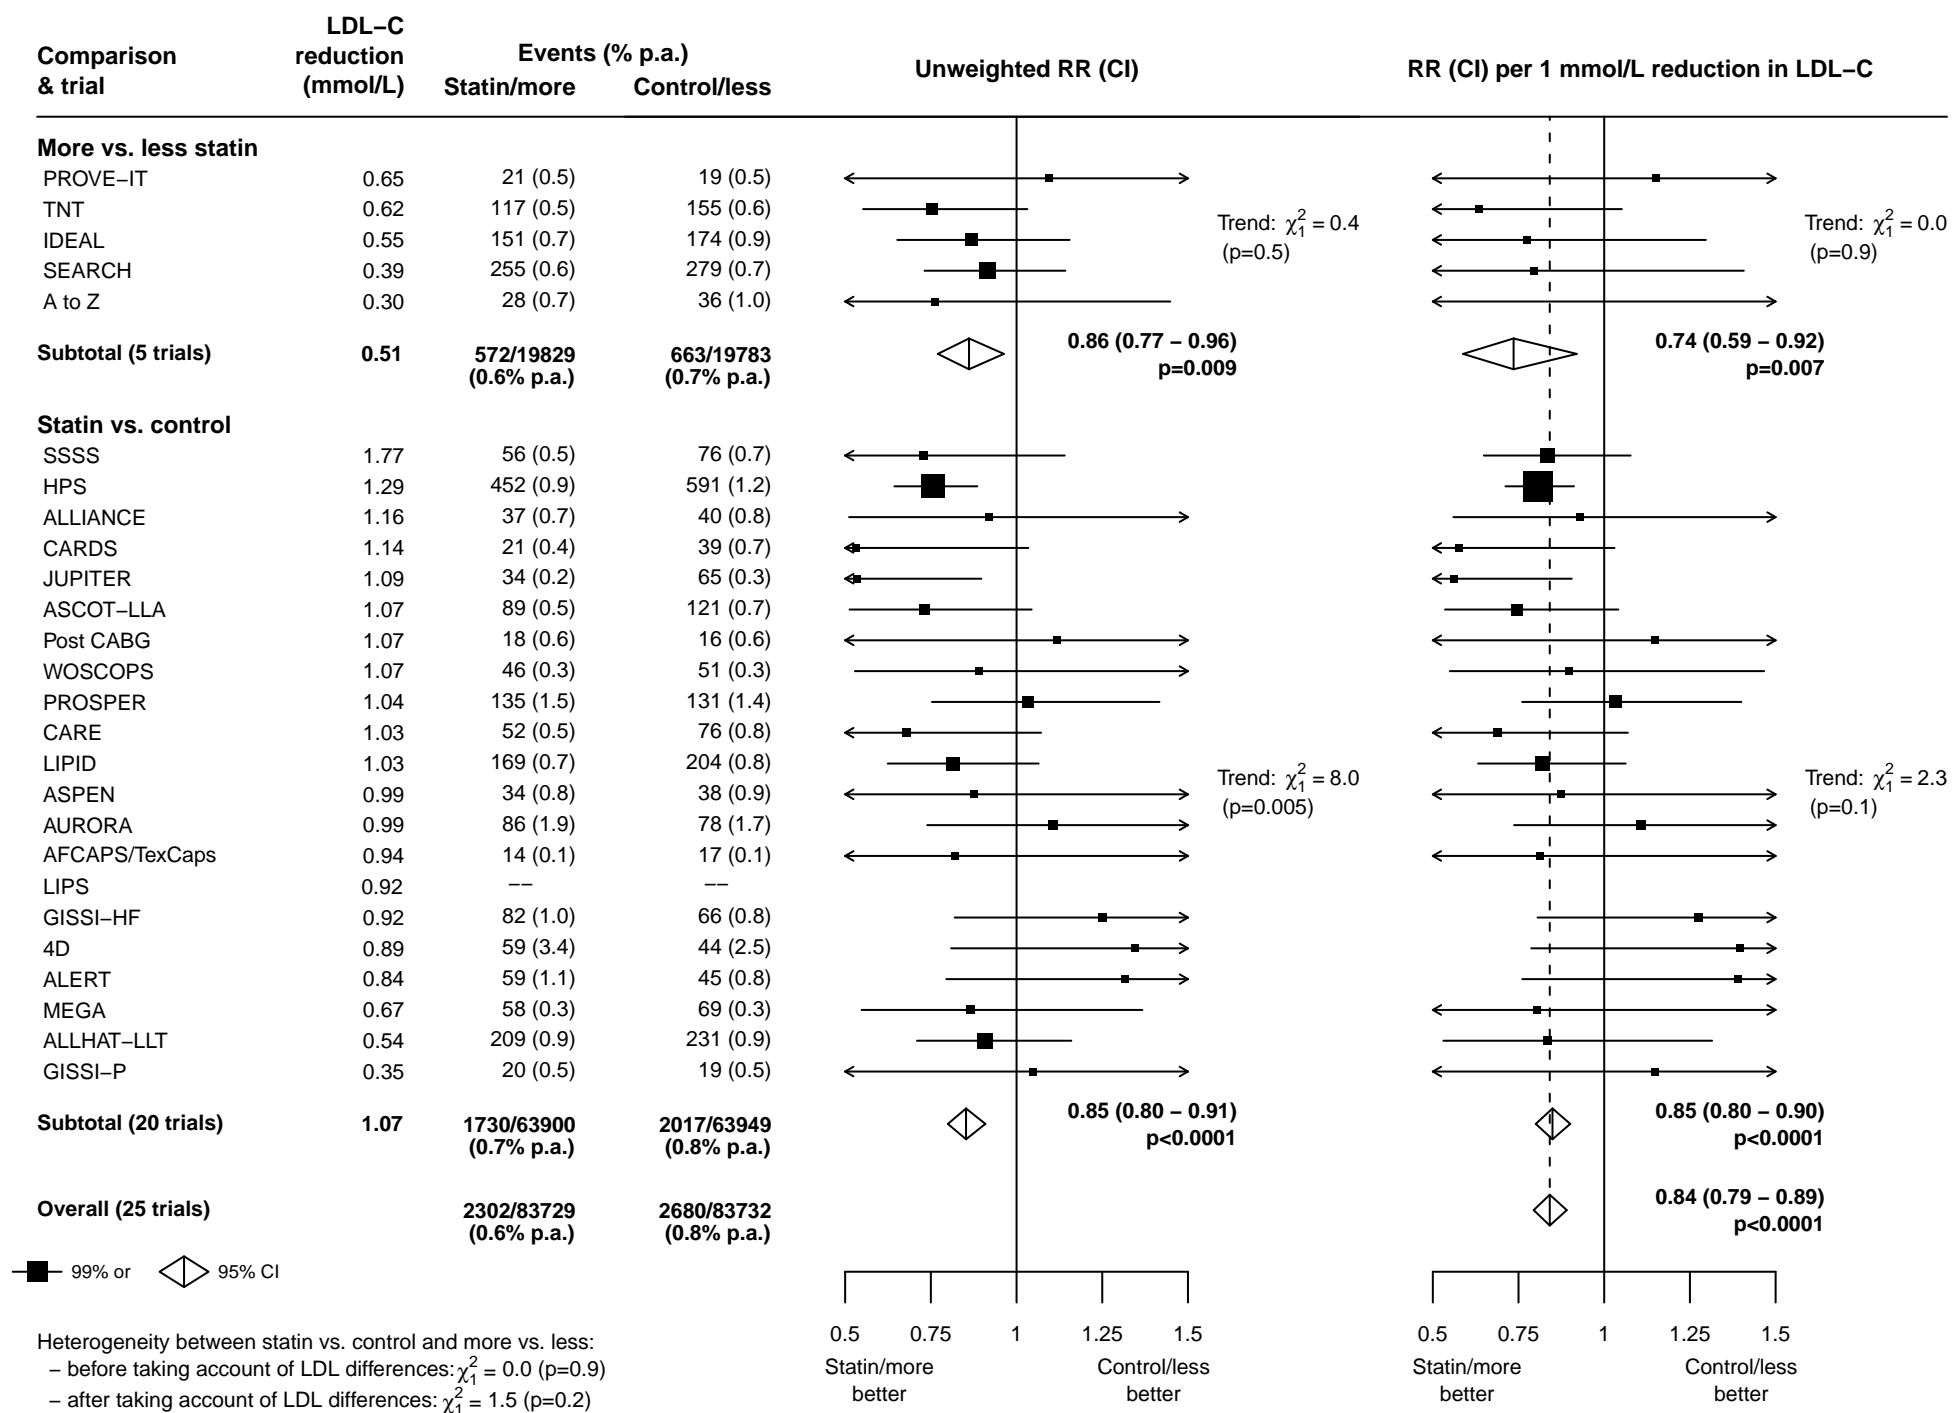

**Webfigure 7: Effects on ISCHAEMIC STROKE in each study**

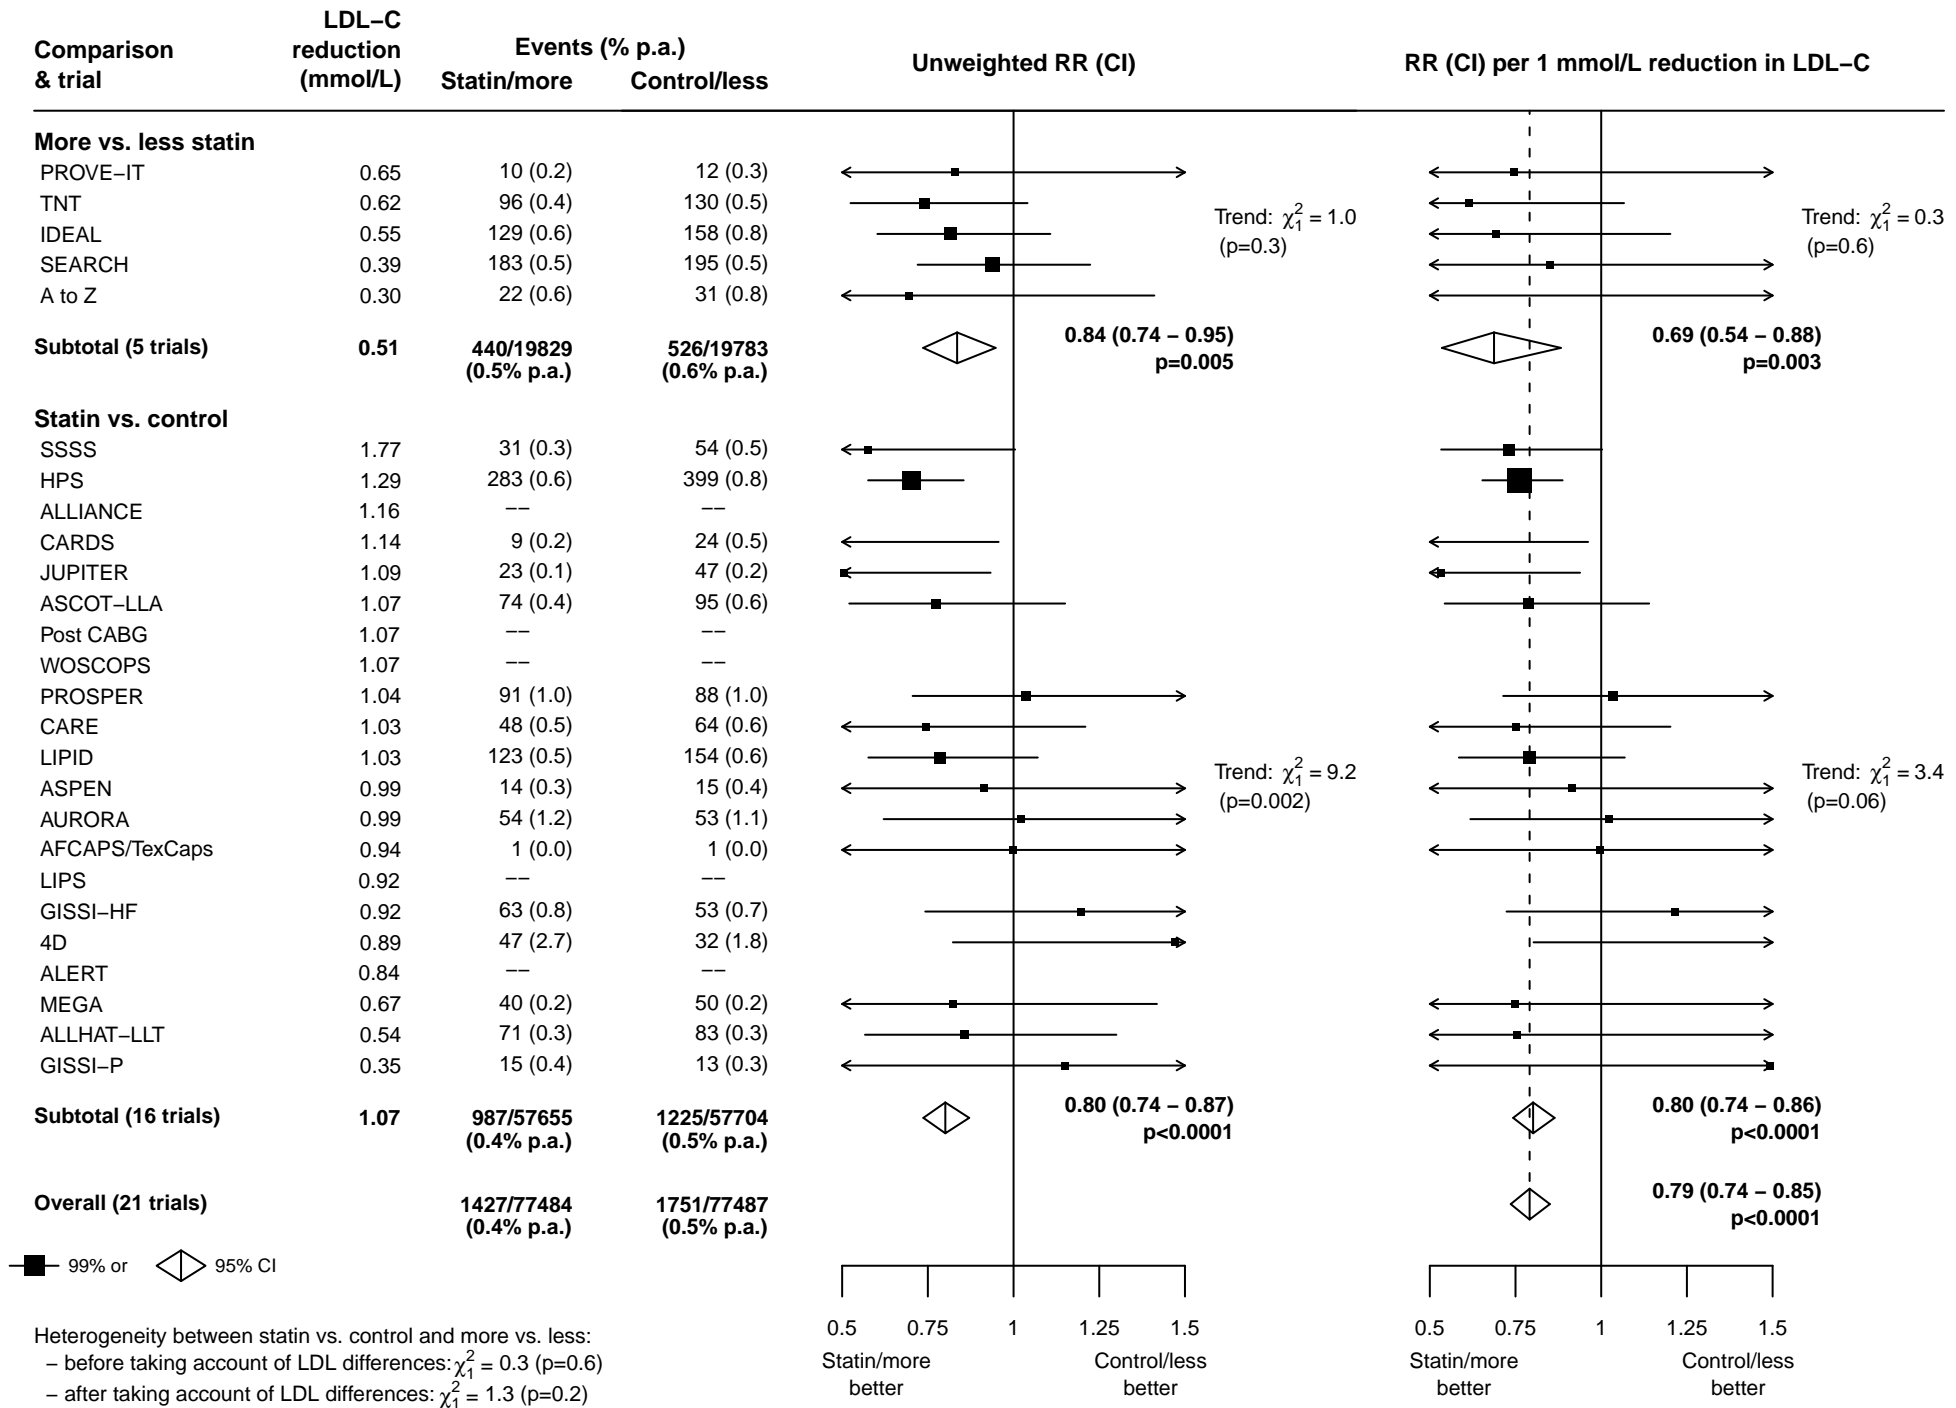

**Webfigure 8: Effects on HAEMORRHAGIC STROKE in each study**

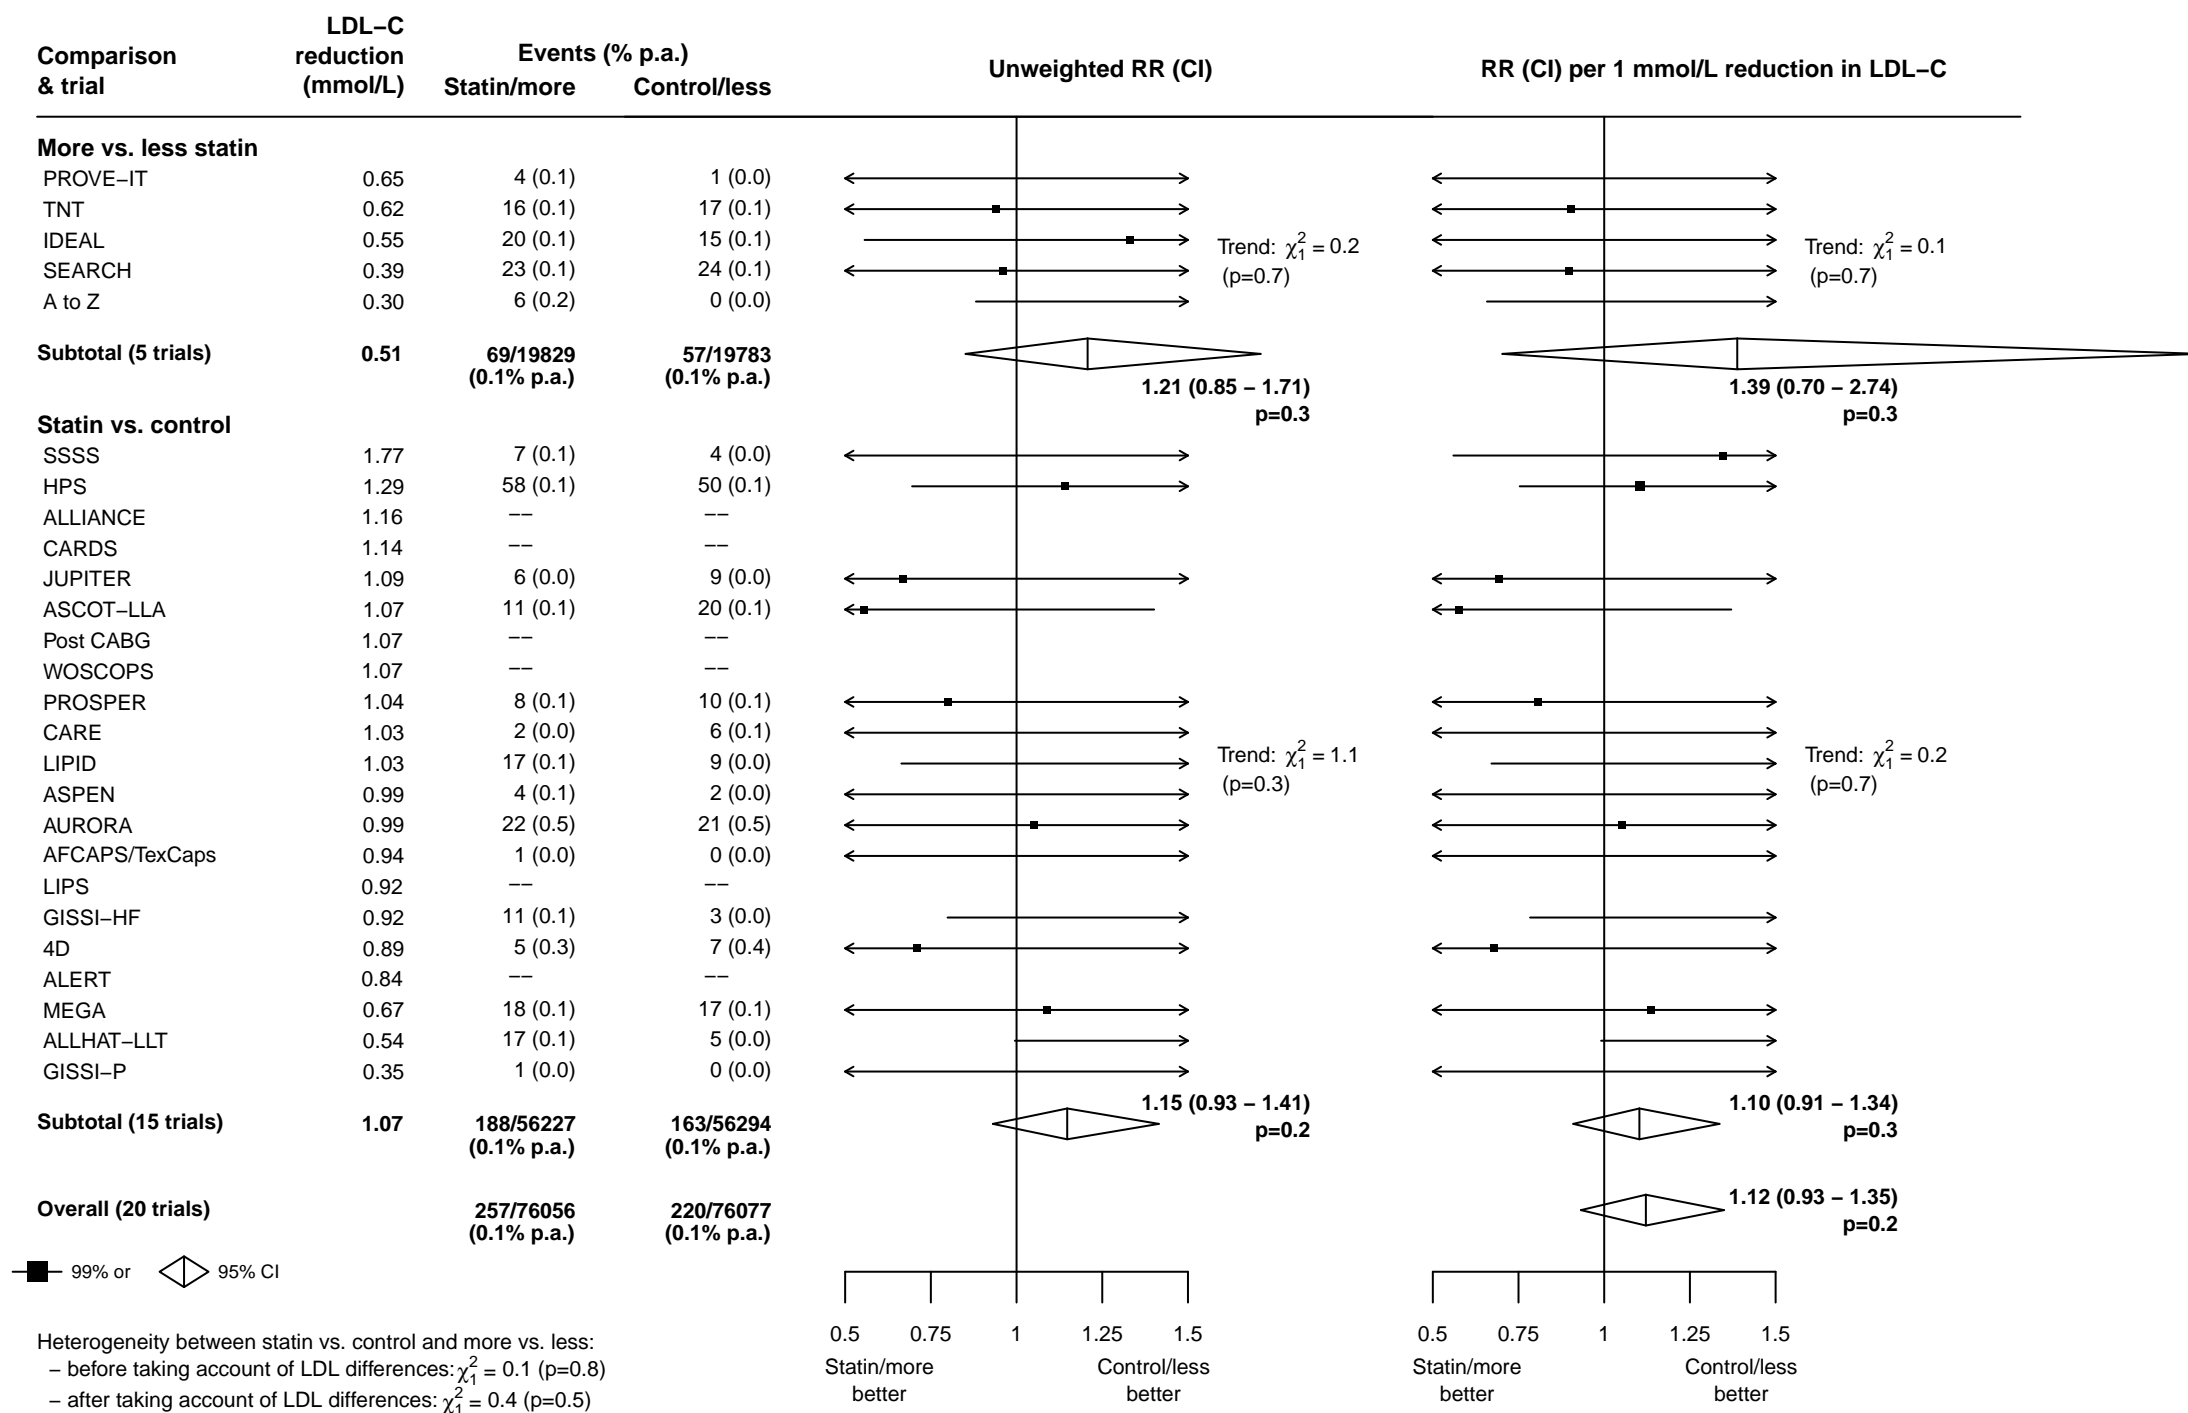

**Webfigure 9: Effects on MAJOR VASCULAR EVENTS per mmol/L reduction in LDL cholesterol, by baseline prognostic factors in 5 more vs less trials**

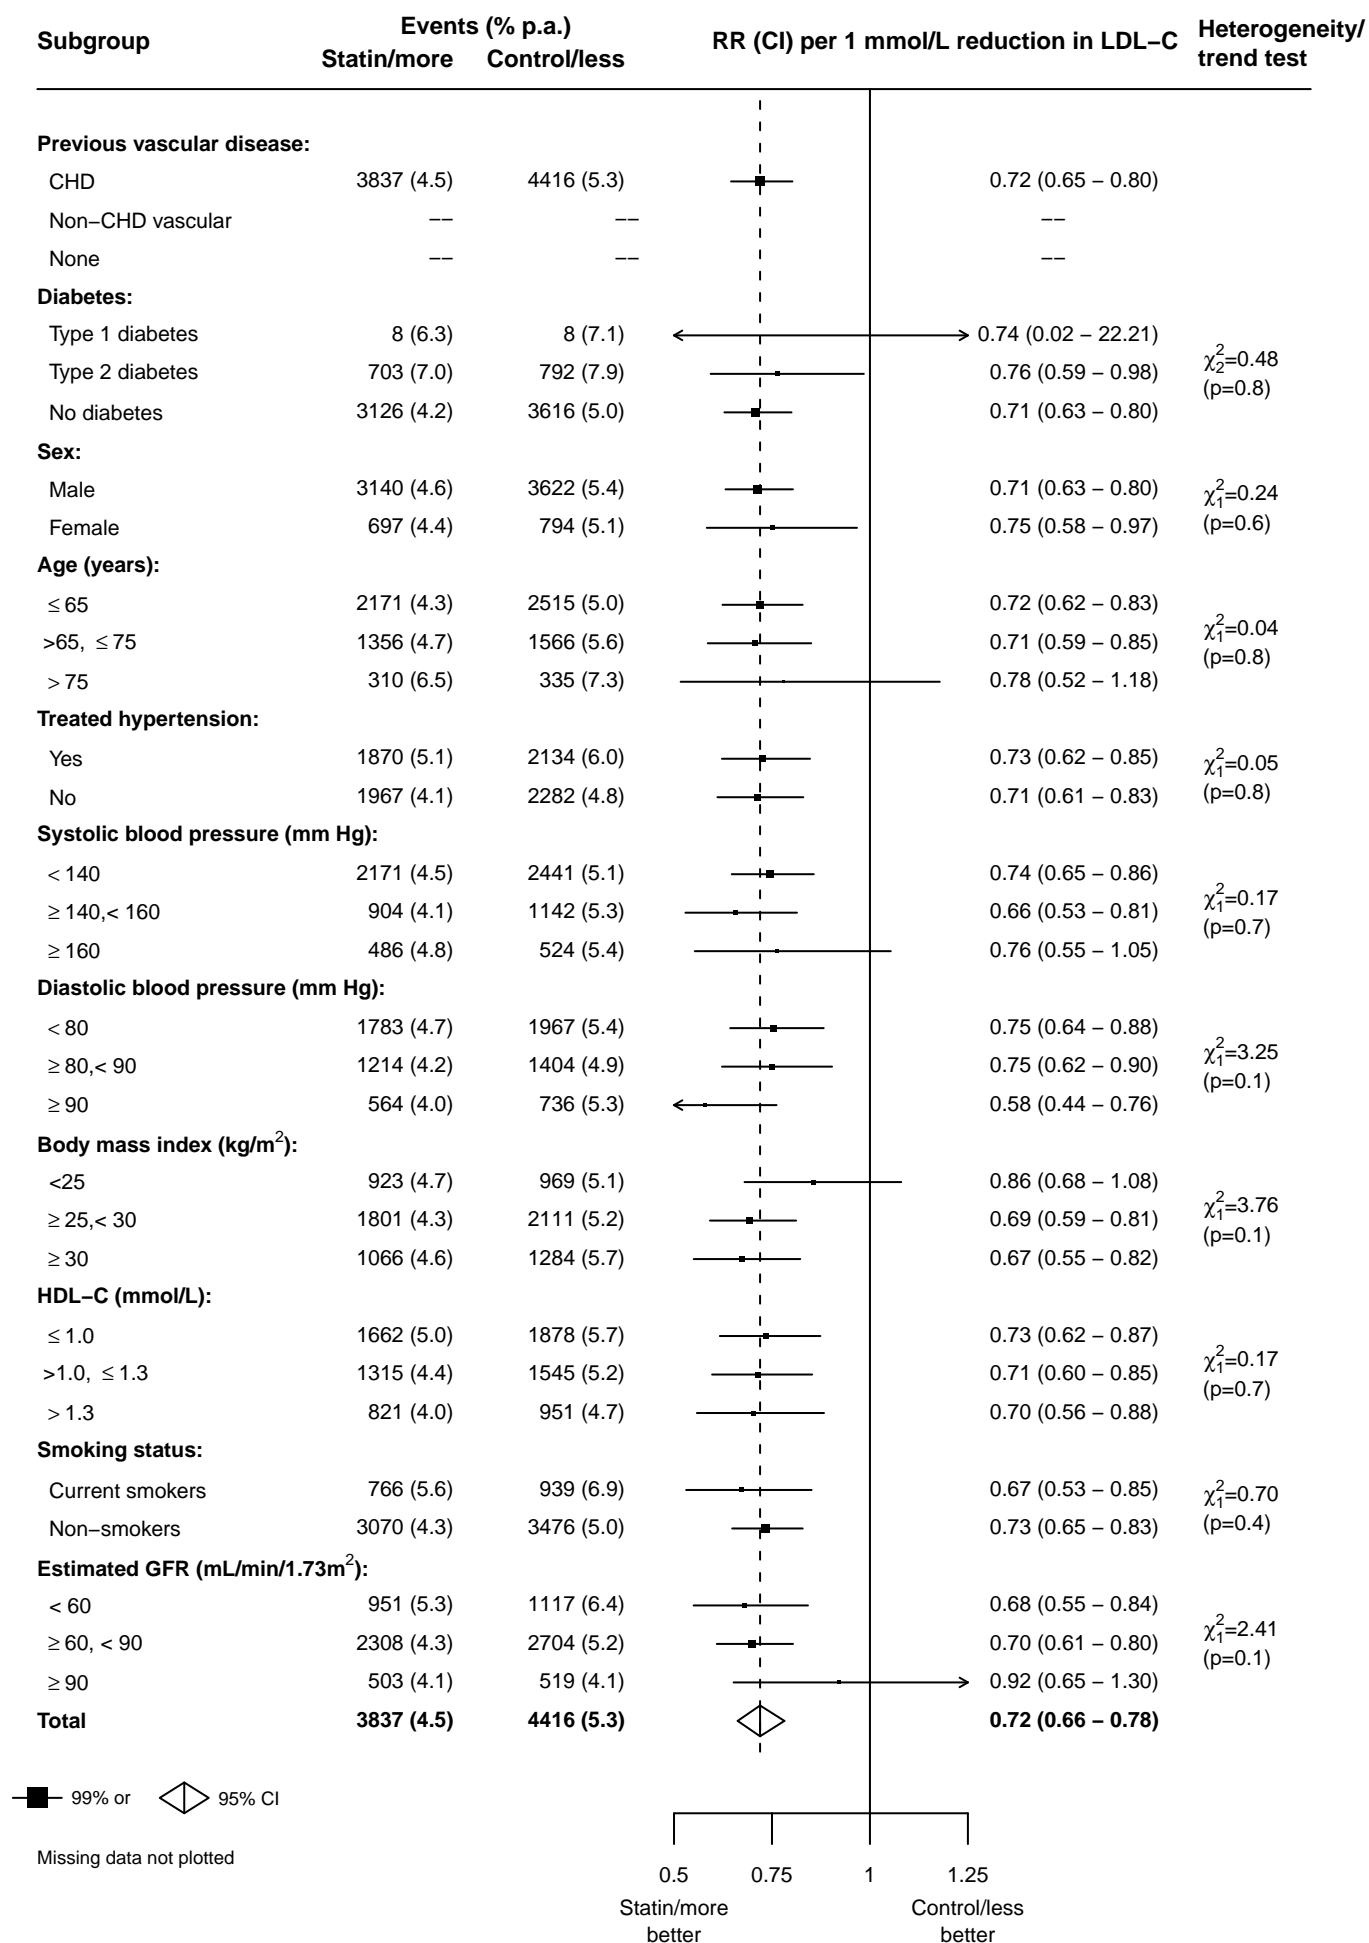

**Webfigure 10: Effects on MAJOR VASCULAR EVENTS per mmol/L reduction in LDL cholesterol, by baseline prognostic factors in 21 statin vs control trials**

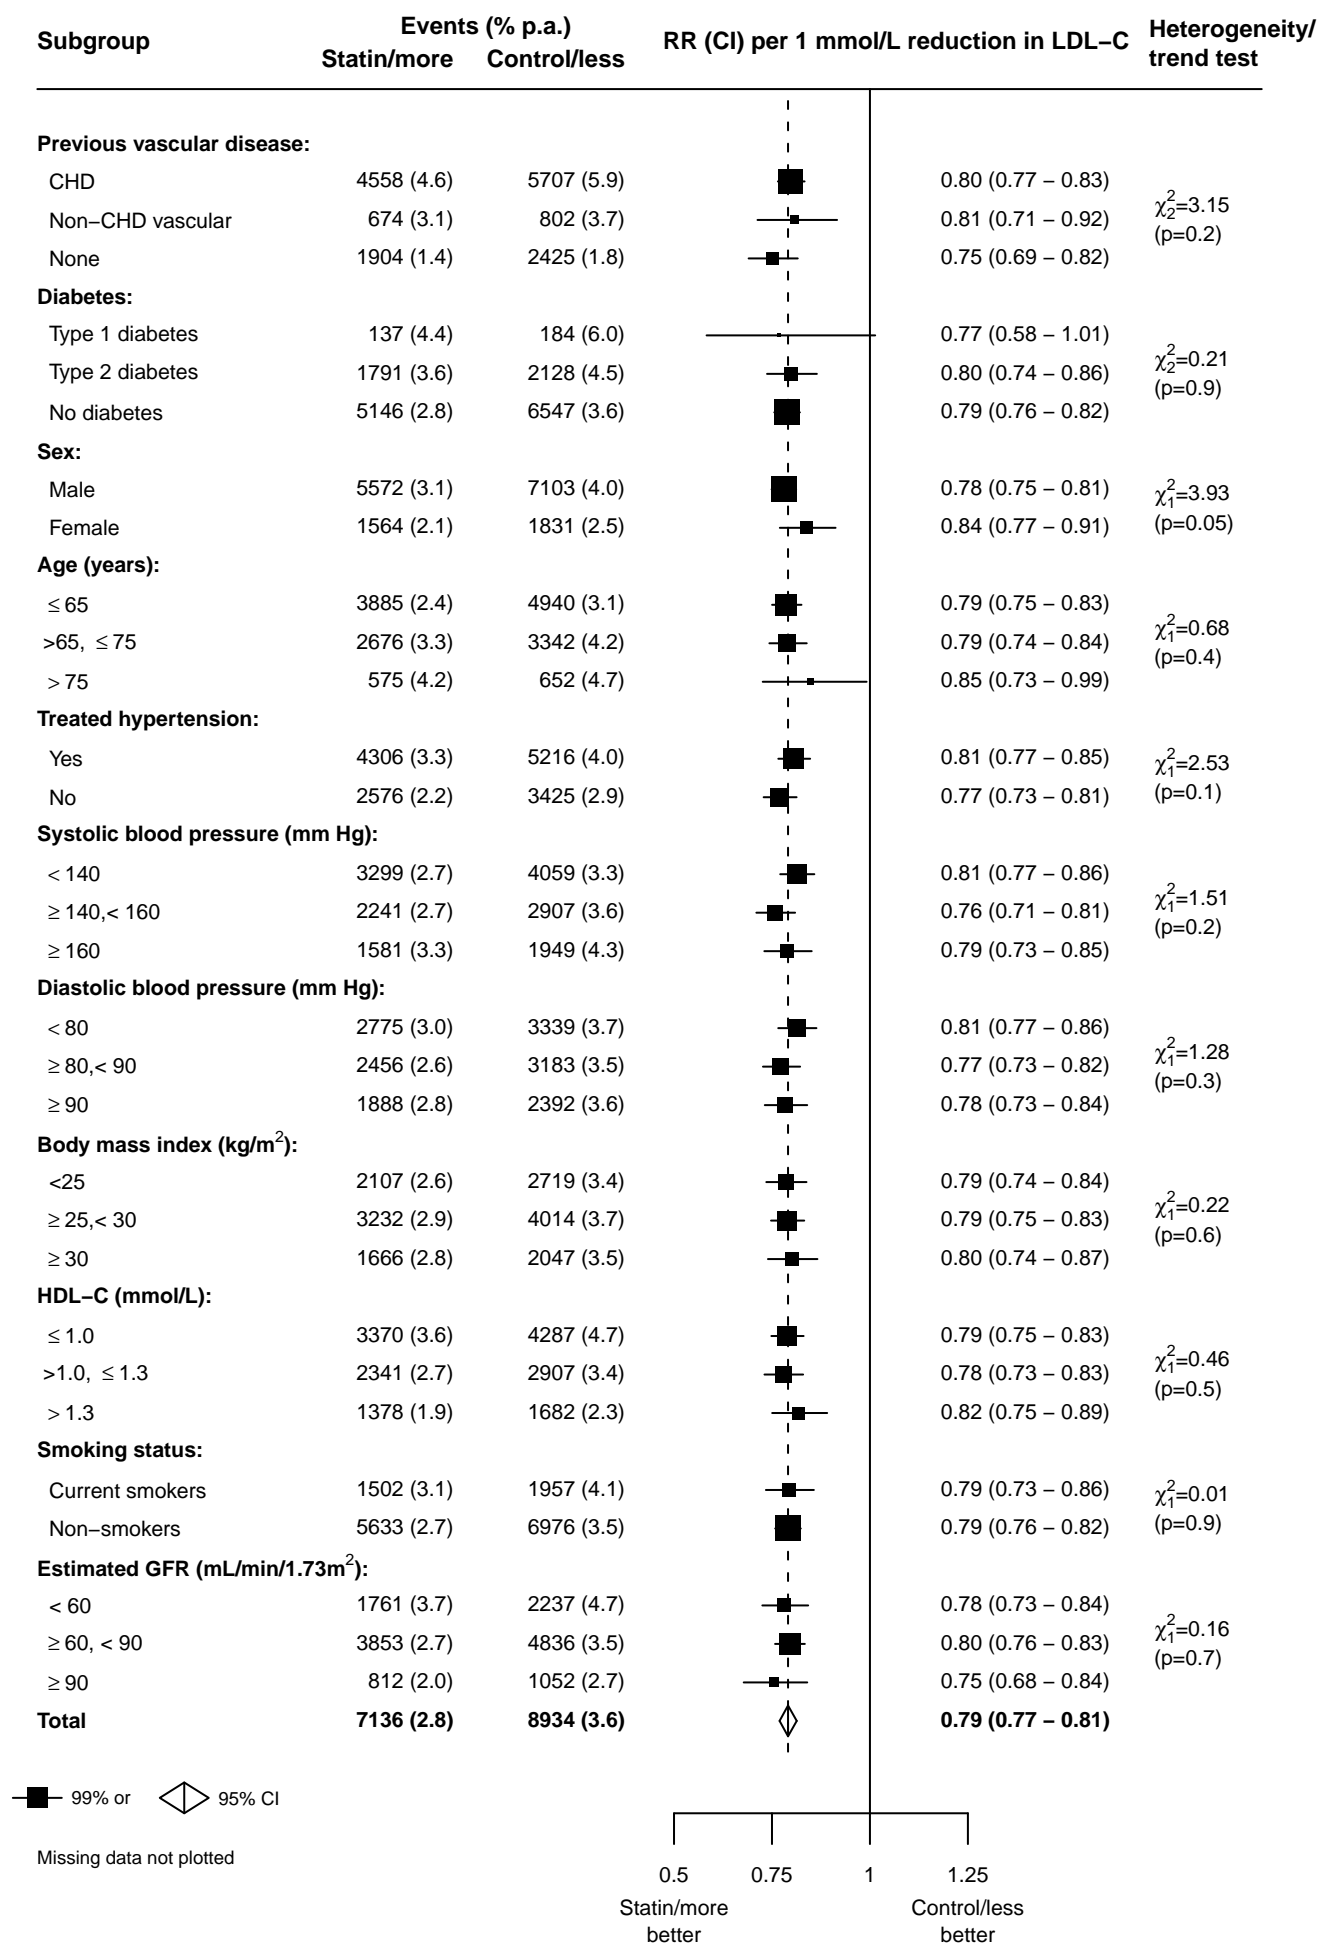

**Webfigure 11: Effects on CANCER INCIDENCE in each study**

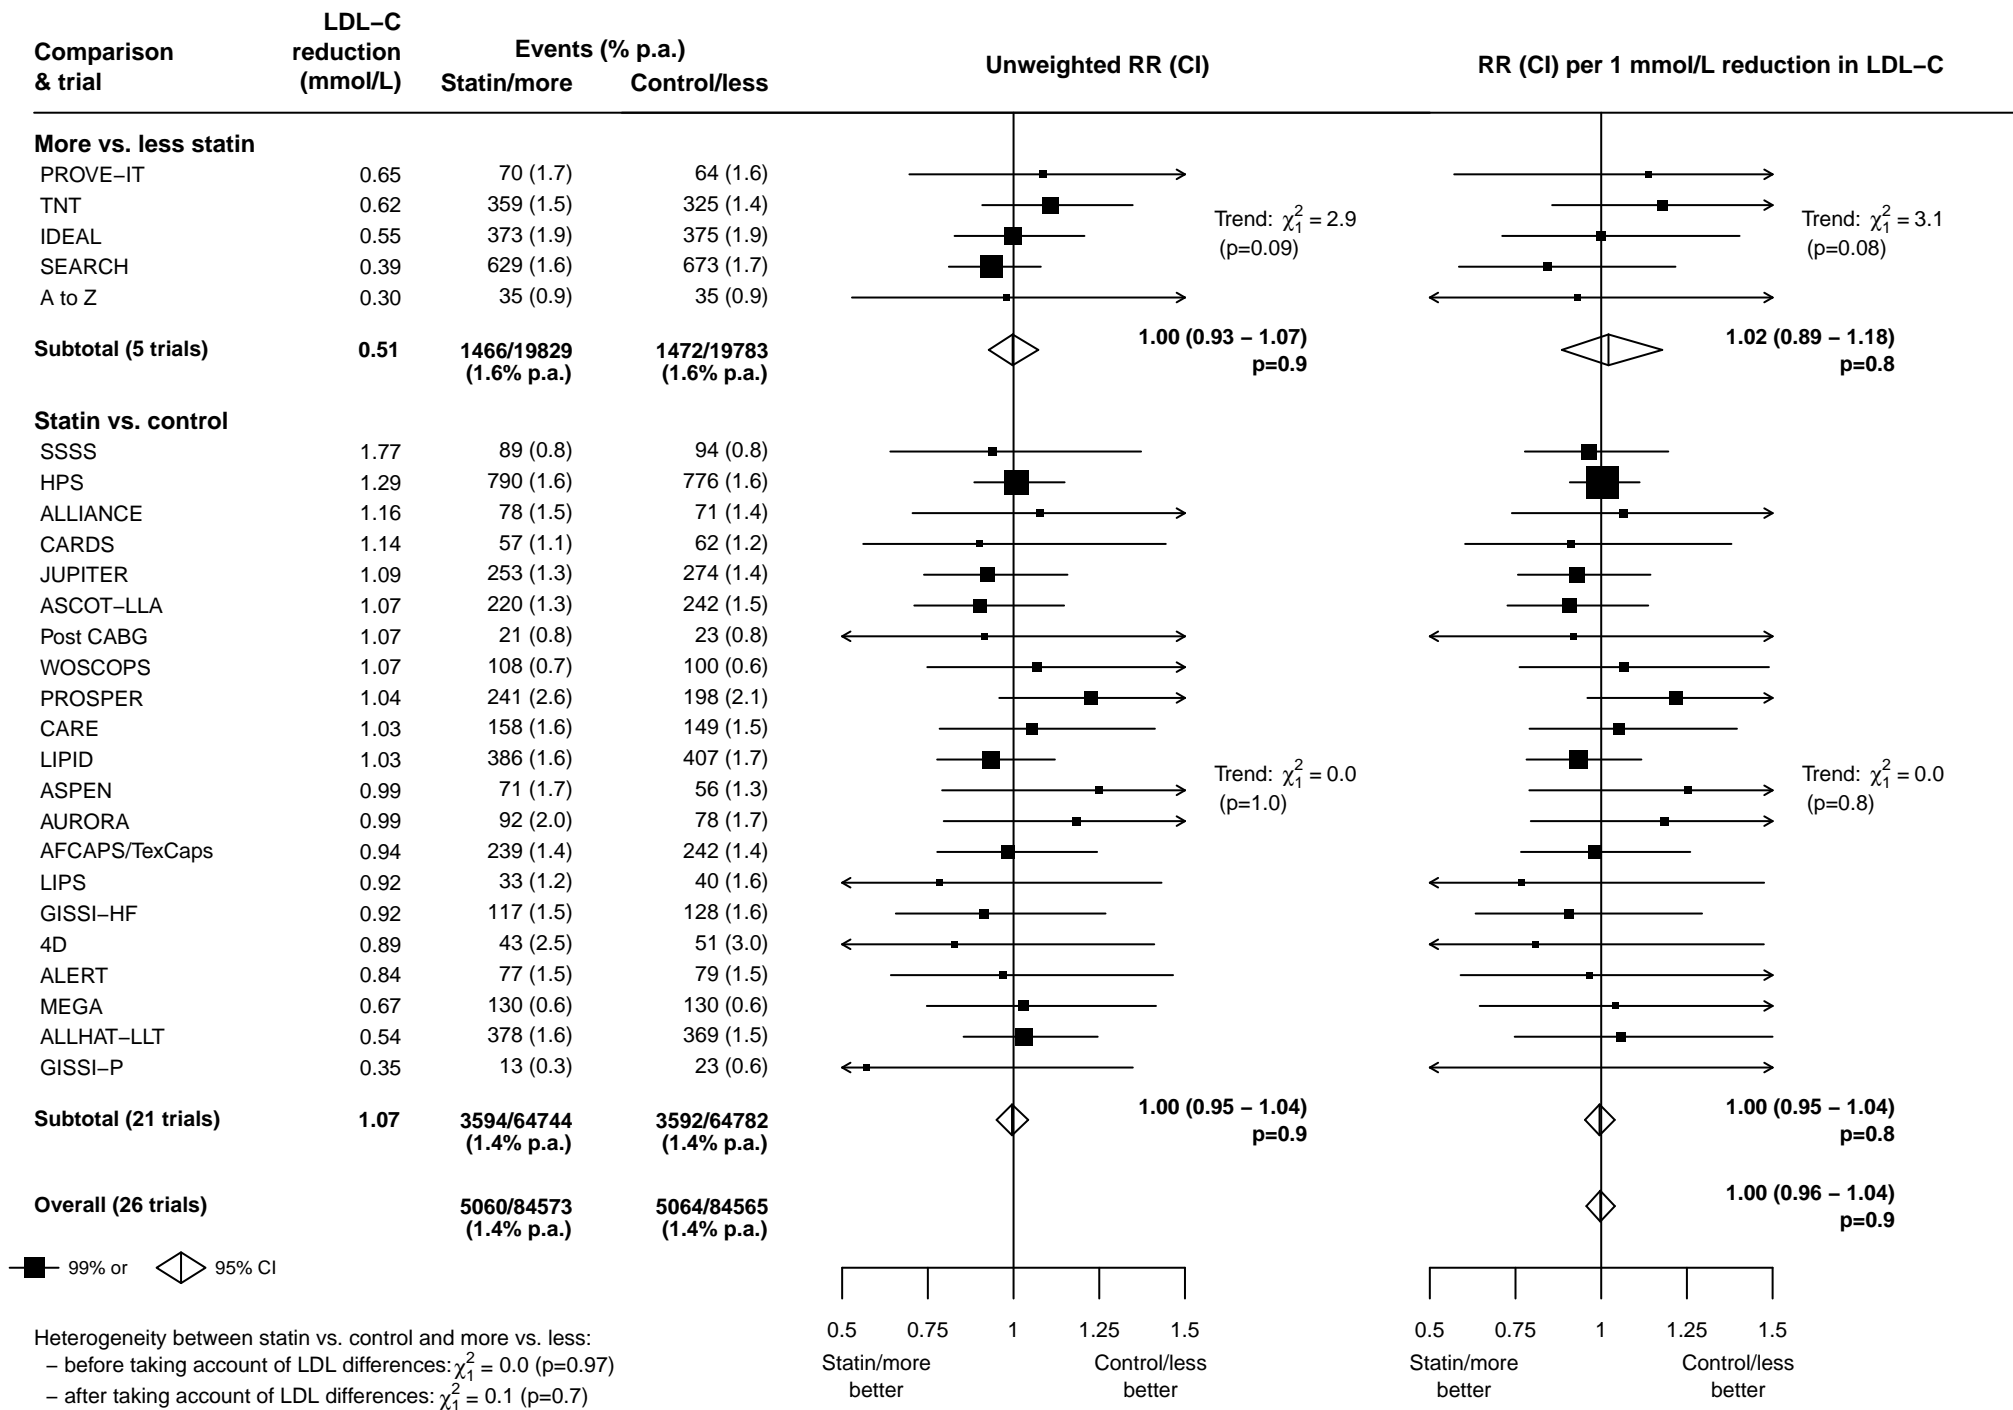

## References for participating trials

1. Scandinavian Simvastatin Survival Study Group. Randomised trial of cholesterol lowering in 4444 patients with coronary heart disease: the Scandinavian Simvastatin Survival Study (4S). *Lancet* 1994; **344**: 1383-9.
2. Shepherd J, Cobbe SM, Ford I, Isles CG, Lorimer AR, MacFarlane PW et al. Prevention of coronary heart disease with pravastatin in men with hypercholesterolemia. West of Scotland Coronary Prevention Study Group. *N Engl J Med* 1995; **333**: 1301-7.
3. Sacks FM, Pfeffer MA, Moye LA, Rouleau JL, Rutherford JD, Cole TG et al. The effect of pravastatin on coronary events after myocardial infarction in patients with average cholesterol levels. Cholesterol and Recurrent Events Trial investigators. *N Engl J Med* 1996; **335**: 1001-9.
4. The effect of aggressive lowering of low-density lipoprotein cholesterol levels and low-dose anticoagulation on obstructive changes in saphenous-vein coronary-artery bypass grafts. The Post Coronary Artery Bypass Graft Trial Investigators. *N Engl J Med* 1997; **336**: 153-62.
5. Downs JR, Clearfield M, Weis S, Whitney E, Shapiro DR, Beere PA et al. Primary prevention of acute coronary events with lovastatin in men and women with average cholesterol levels: results of AFCAPS/TexCAPS. Air Force/Texas Coronary Atherosclerosis Prevention Study. *JAMA* 1998; **279**: 1615-22.
6. The Long-Term Intervention with Pravastatin in Ischaemic Disease (LIPID) Study Group. Prevention of cardiovascular events and death with pravastatin in patients with coronary heart disease and a broad range of initial cholesterol levels. *N Engl J Med* 1998; **339**: 1349-57.
7. GISSI Prevenzione Investigators (Gruppo Italiano per lo Studio della Sopravvivenza nell'Infarto Miocardico). Results of the low-dose (20 mg) pravastatin GISSI Prevenzione trial in 4271 patients with recent myocardial infarction: do stopped trials contribute to overall knowledge? *Ital Heart J* 2000; **1**: 810-20.
8. Serruys PWJC, de Feyter P, Macaya C, Kokott N, Puel J, Vrolix M et al. Fluvastatin for prevention of cardiac events following successful first percutaneous coronary intervention - A randomized controlled trial. *JAMA* 2002; **287**: 3215-22.
9. Heart Protection Study Collaborative Group. MRC/BHF Heart Protection Study of cholesterol lowering with simvastatin in 20 536 high-risk individuals: a randomised placebo-controlled trial. *Lancet* 2002; **360**: 7-22.



10. Shepherd J, Blauw GJ, Murphy MB, Bollen EL, Buckley BM, Cobbe SM et al. Pravastatin in elderly individuals at risk of vascular disease (PROSPER): a randomised controlled trial. *Lancet* 2002; **360**: 1623-30.
11. The ALLHAT Officers and Coordinators for the ALLHAT Collaborative Research Group. Major outcomes in moderately hypercholesterolemic, hypertensive patients randomized to pravastatin vs usual care: the Antihypertensive and Lipid-lowering treatment to prevent heart attack trial (ALLHAT-LLT). *JAMA* 2002; **288**: 2998-3007.
12. Sever PS, Dahlof B, Poulter NR, Wedel H, Beevers G, Caulfield M et al. Prevention of coronary and stroke events with atorvastatin in hypertensive patients who have average or lower-than-average cholesterol concentrations, in the Anglo-Scandinavian Cardiac Outcomes Trial -Lipid Lowering Arm (ASCOT-LLA): a multicentre randomised controlled trial. *Lancet* 2003; **361**: 1149-58.
13. Holdaas H, Fellstrom B, Jardine AG, Holme I, Nyberg G, Fauchald P et al. Effect of fluvastatin on cardiac outcomes in renal transplant recipients: a multicentre, randomised, placebo-controlled trial. *Lancet* 2003; **361**: 2024-31.
14. Colhoun HM, Betteridge DJ, Durrington PN, Hitman GA, Neil HAW, Livingstone SJ et al. Primary prevention of cardiovascular disease with atorvastatin in type 2 diabetes in the Collaborative Atorvastatin Diabetes Study (CARDS): multicentre randomised placebo-controlled trial. *Lancet* 2004; **364**: 685-96.
15. Koren MJ, Hunninghake DB. Clinical outcomes in managed-care patients with coronary heart disease treated aggressively in lipid-lowering disease management clinics: the ALLIANCE study. *J Am Coll Cardiol* 2004; **44**: 1772-9.
16. Wanner C, Krane V, Marz W, Olschewski M, Mann JF, Ruf G et al. Atorvastatin in patients with type 2 diabetes mellitus undergoing hemodialysis. *N Engl J Med* 2005; **353**: 238-48.
17. Knopp RH, d'Emden M, Smilde JG, Pocock SJ. Efficacy and safety of atorvastatin in the prevention of cardiovascular end points in subjects with type 2 diabetes: the Atorvastatin Study for Prevention of Coronary Heart Disease Endpoints in non-insulin-dependent diabetes mellitus (ASPEN). *Diabetes Care* 2006; **29**: 1478-85.

18. Nakamura H, Arakawa K, Itakura H, Kitabatake A, Goto Y, Toyota T et al. Primary prevention of cardiovascular disease with pravastatin in Japan (MEGA Study): a prospective randomised controlled trial. *Lancet* 2006; **368**: 1155-63.
19. Ridker PM, Danielson E, Fonseca FAH, Genest J, Gotto AM, Kastelein JJP, et al for the JUPITER Study Group. Rosuvastatin to prevent vascular events in men and women with elevated C-reactive protein. *N Engl J Med* 2008; **359**: 2195-207.
20. GISSI-HF Investigators. Effects of rosuvastatin in patients with chronic heart failure (the GISSI-HF trial): a randomized, double-blind, placebo-controlled trial. *Lancet* 2008; **372**: 1231-39.
21. Fellstrom BC, Jardine, AG, Schmieder RE, Holdass H, Bannister K, Beutler J, et al Rosuvastatin and cardiovascular events in patients undergoing hemodialysis. *N Engl J Med* 2009; **360**: 1395-407.
22. Cannon CP, Braunwald E, McCabe CH, Rader DJ, Rouleau JL, Belder R et al. Intensive versus moderate lipid lowering with statins after acute coronary syndromes. *N Engl J Med* 2004; **350**: 1495-504.
23. de Lemos JA, Blazing MA, Wiviott SD, Lewis EF, Fox KA, White HD et al. Early intensive vs a delayed conservative simvastatin strategy in patients with acute coronary syndromes: phase Z of the A to Z trial. *JAMA* 2004 September 15; **292**: 1307-16.
24. LaRosa JC, Grundy SM, Waters DD, Shear C, Barter P, Fruchart JC et al. Intensive lipid lowering with atorvastatin in patients with stable coronary disease. *N Engl J Med* 2005; **352**: 1425-35.
25. Pedersen TR, Faergeman O, Kastelein JJ, Olsson AG, Tikkanen MJ, Holme I et al. High-dose atorvastatin vs usual-dose simvastatin for secondary prevention after myocardial infarction: the IDEAL study: a randomized controlled trial. *JAMA* 2005; **294**: 2437-45.
26. Study of the Effectiveness of Additional Reductions in Cholesterol and Homocysteine (SEARCH) Collaborative Group. Study of the Effectiveness of more intensive LDL-lowering therapy with 80mg versus 20mg simvastatin daily in 12 064 myocardial infarction survivors. *Lancet* (in press).
